# Supplementary material for: Synthesis and Comparative Structure–Activity Study of Carbohydrate-Based Phenolic Compounds as α-Glucosidase Inhibitors and Antioxidants
Source: PubMed Central journal article supplement (PMC6930660; doi:10.3390/molecules24234340), 2019-11-27

Supporting Information

# Synthesis and Comparative Structure-Activity Study of Carbohydrate-Based Phenolic Compounds as $\alpha$ -Glucosidase Inhibitors and Antioxidants

Shota Machida, Saki Mukai, Rina Kono, Megumi Hunato, Hiroaki Saito and Taketo Uchiyama \*

School of Pharmacy, Nihon University, 7-7-1 Narashinodai, Funabashi, Chiba 274-8555, Japan

\*Correspondence: taketo.uchiyama@nihon-u.ac.jp; Tel.: +81-047-465-2111 (F.L.)

## Contents

$^1\text{H}$  and  $^{13}\text{C}$  NMR spectra of compound **31** – **44**, **54**, – **58**, **61**, and **67**.

$^1\text{H}$  NMR of compound **31** in  $\text{CD}_3\text{OD}$

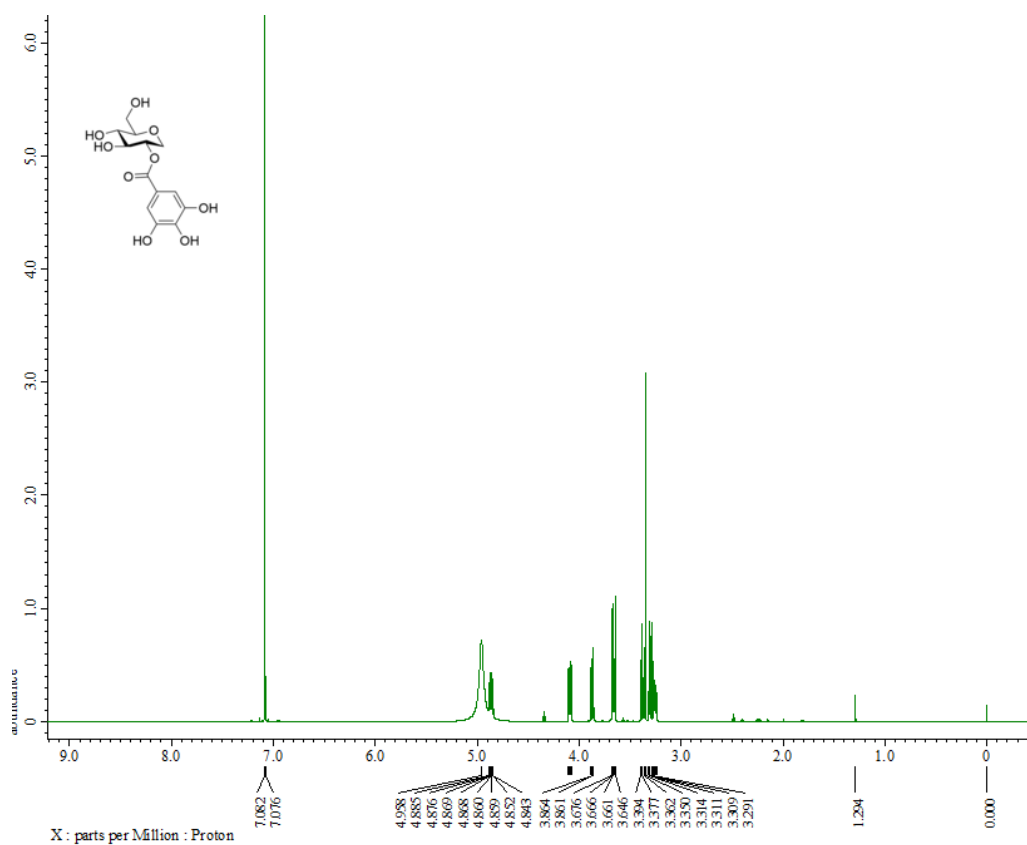

$^{13}\text{C}$  NMR of compound **31** in  $\text{CD}_3\text{OD}$

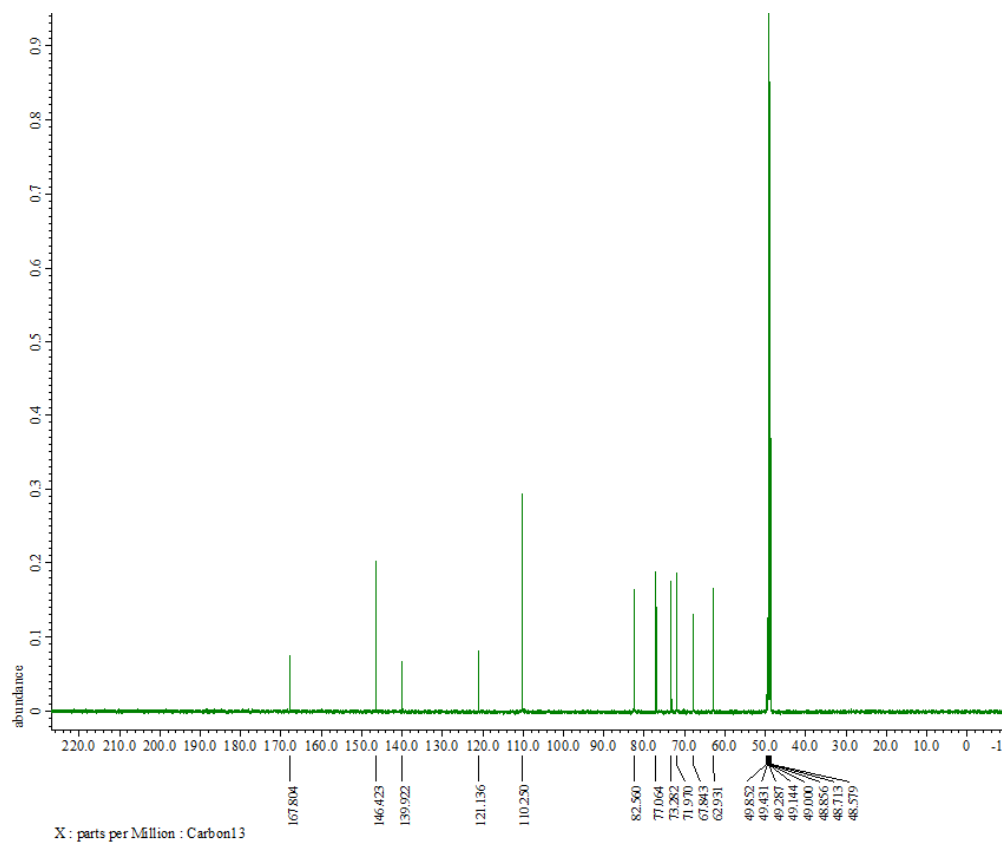

$^1\text{H}$  NMR of compound **32** in  $\text{CD}_3\text{OD}$

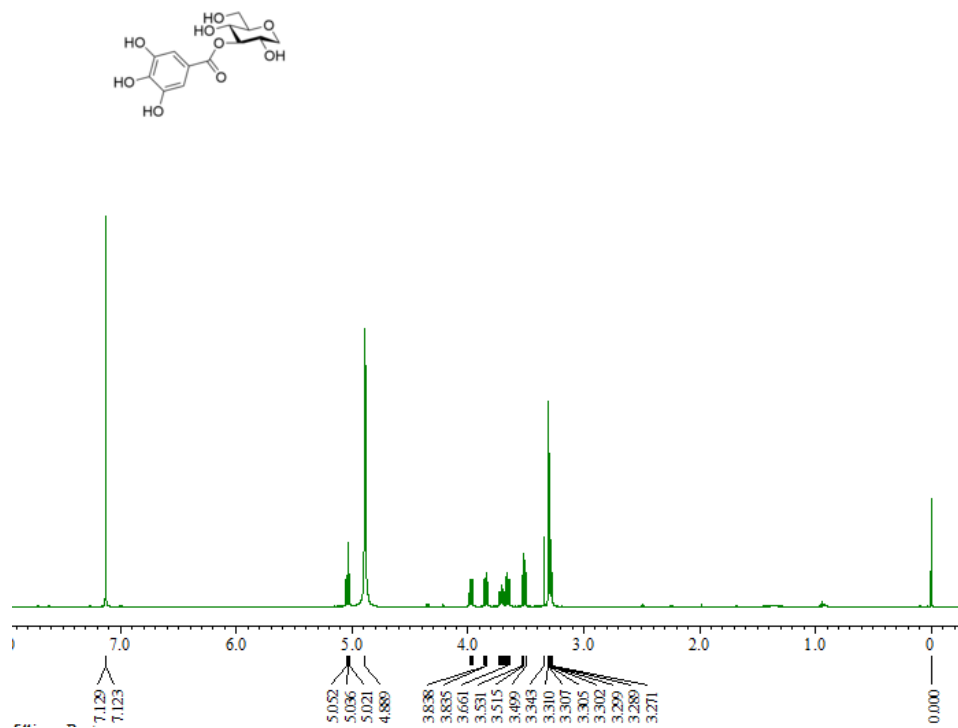

$^{13}\text{C}$  NMR of compound **32** in  $\text{CD}_3\text{OD}$

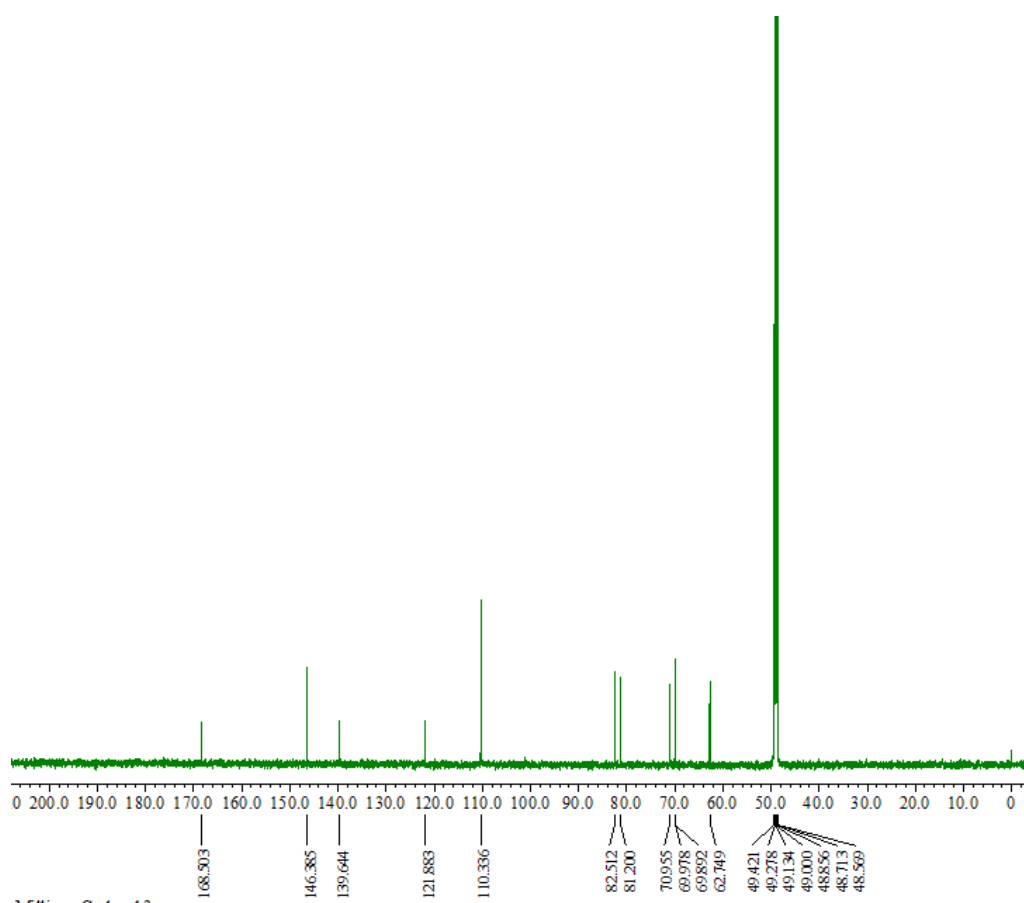

$^1\text{H}$  NMR of compound **33** in Acetone- $d_6$

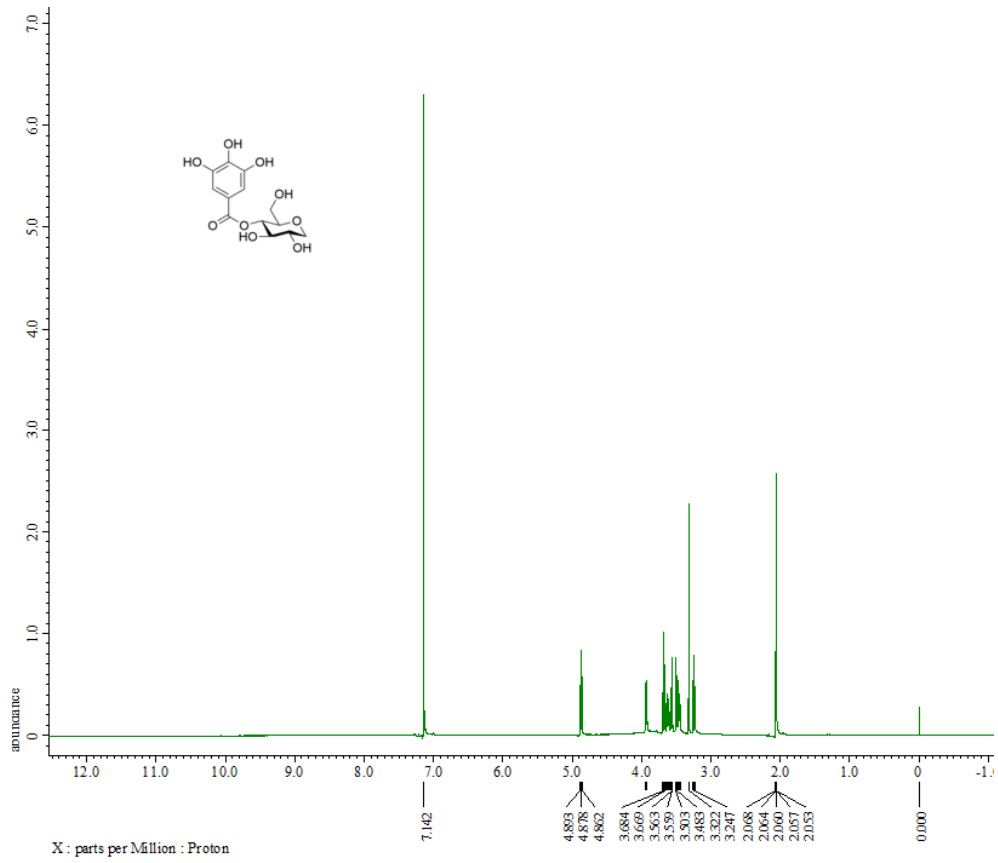

$^{13}\text{C}$  NMR of compound **33** in Acetone- $d_6$

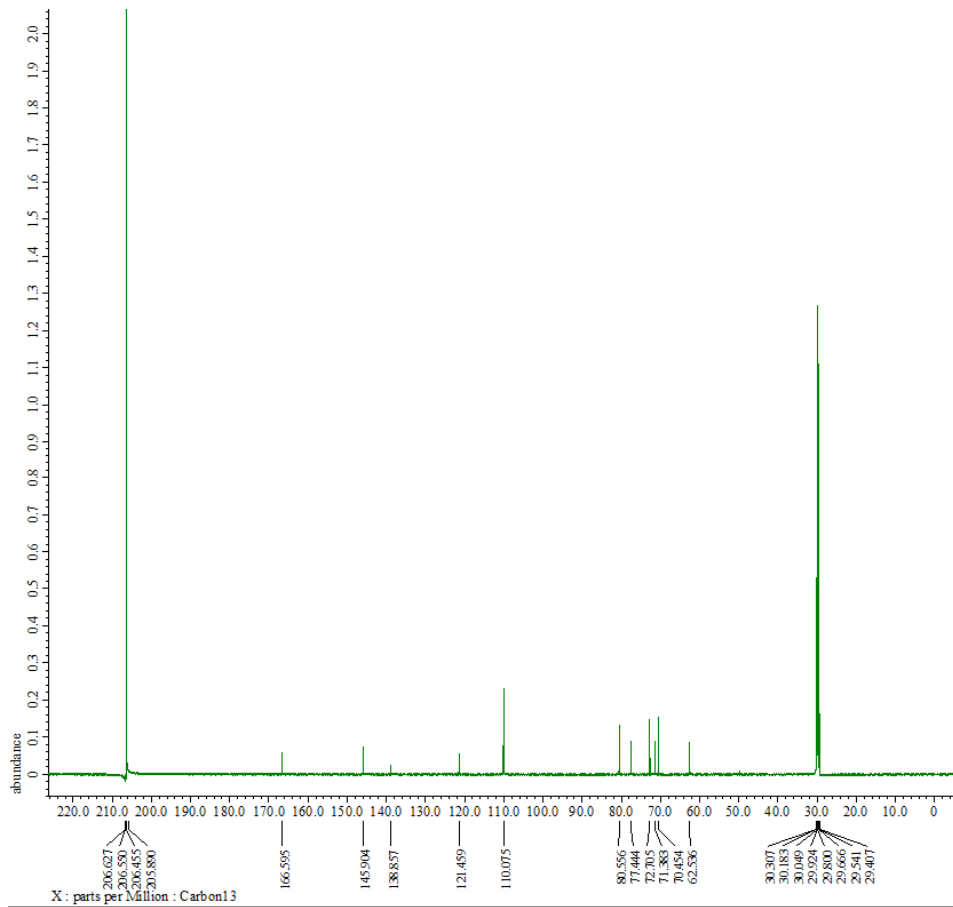

<sup>1</sup>H NMR of compound **34** in CD<sub>3</sub>OD

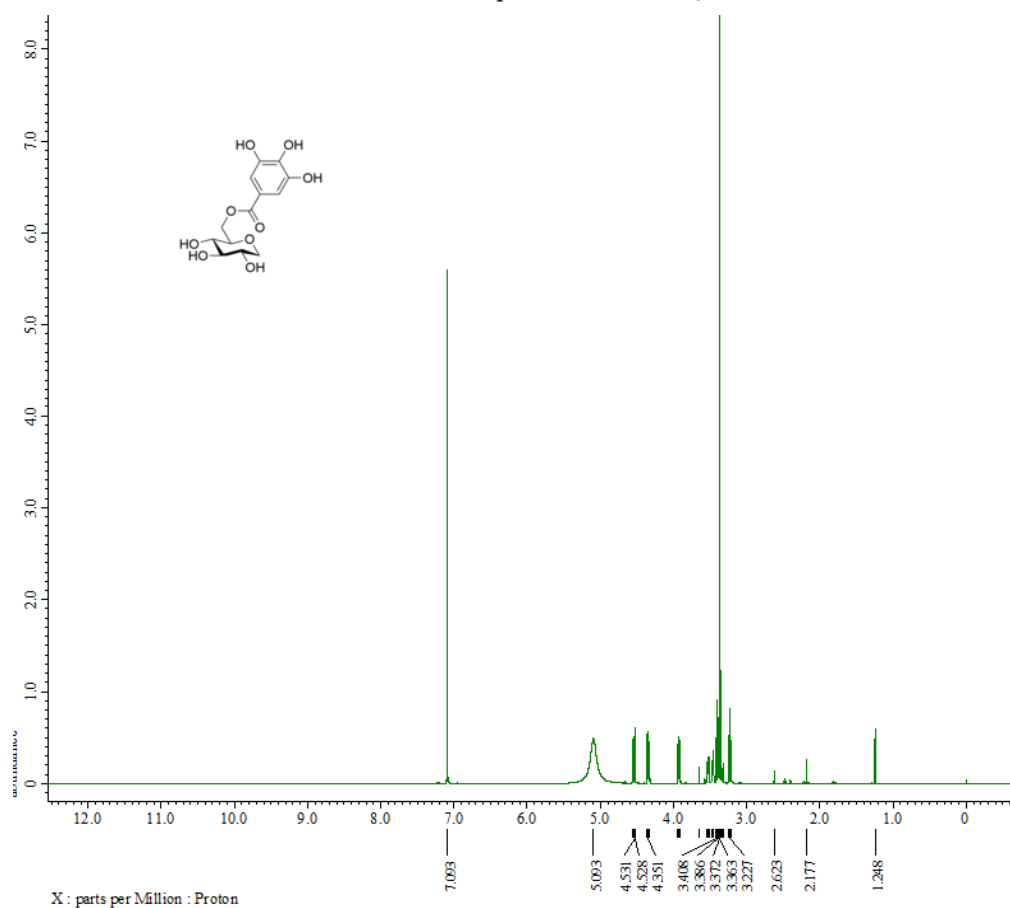

<sup>13</sup>C NMR of compound **34** in CD<sub>3</sub>OD

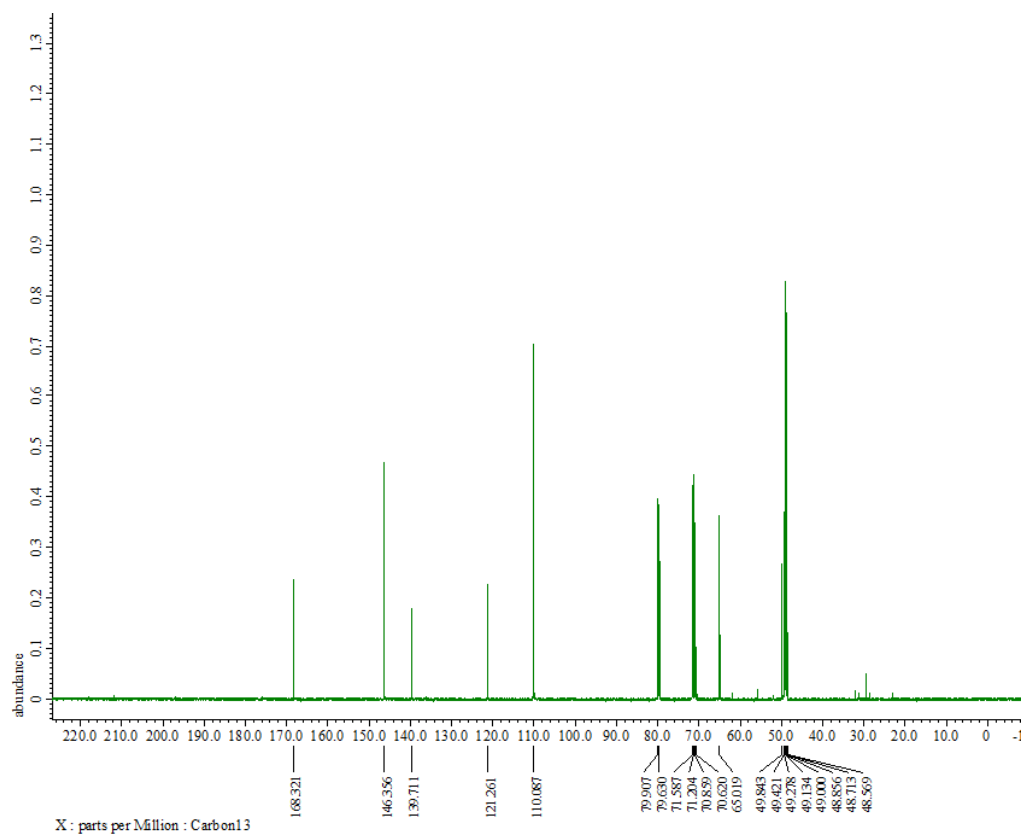

$^1\text{H}$  NMR of compound **35** in  $\text{CD}_3\text{OD}$

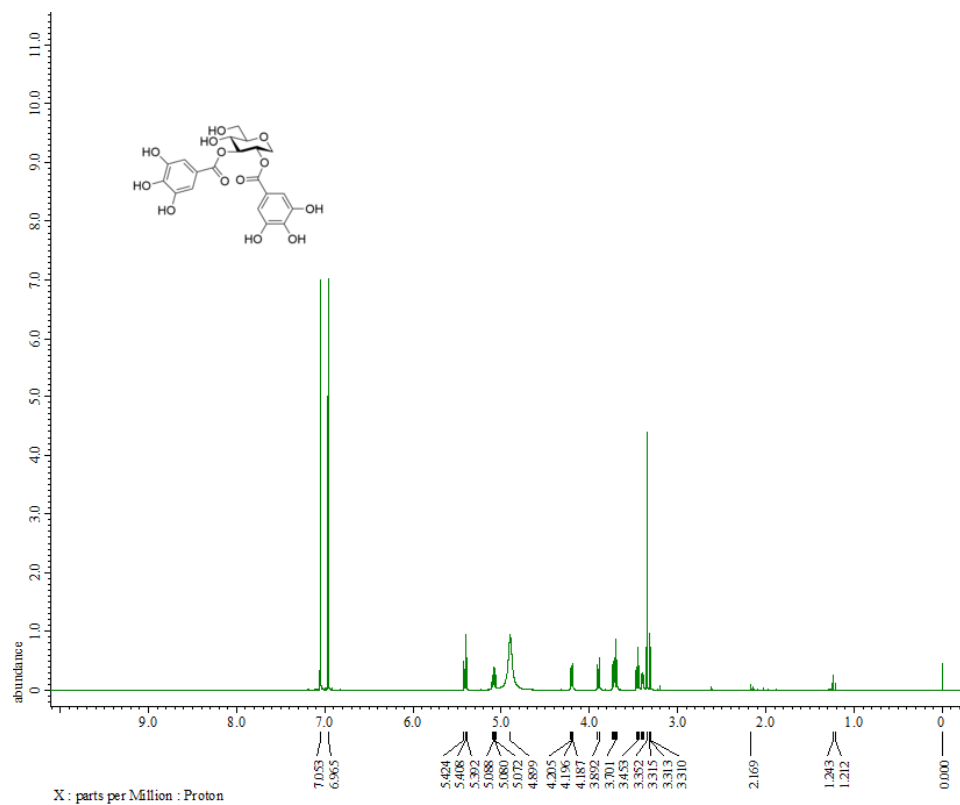

$^{13}\text{C}$  NMR of compound **35** in  $\text{CD}_3\text{OD}$

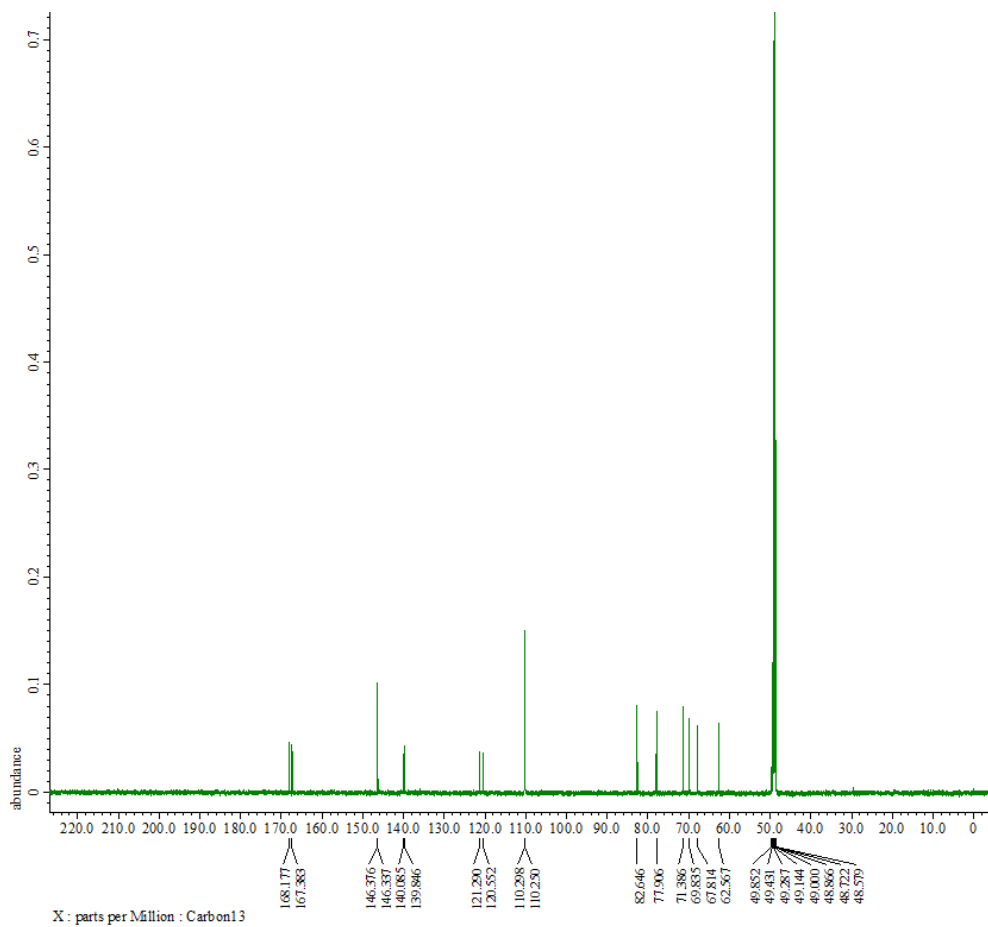

$^1\text{H}$  NMR of compound **36** in Acetone- $d_6$

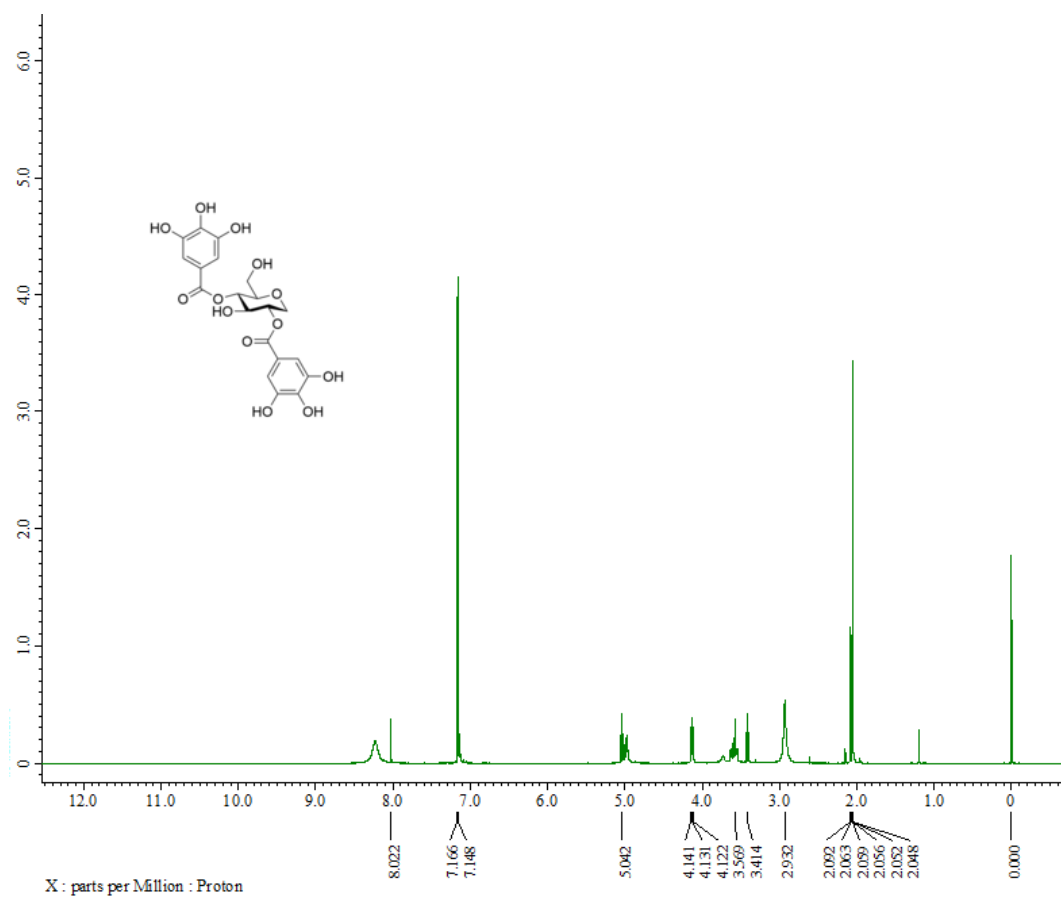

$^{13}\text{C}$  NMR of compound **36** in Acetone- $d_6$

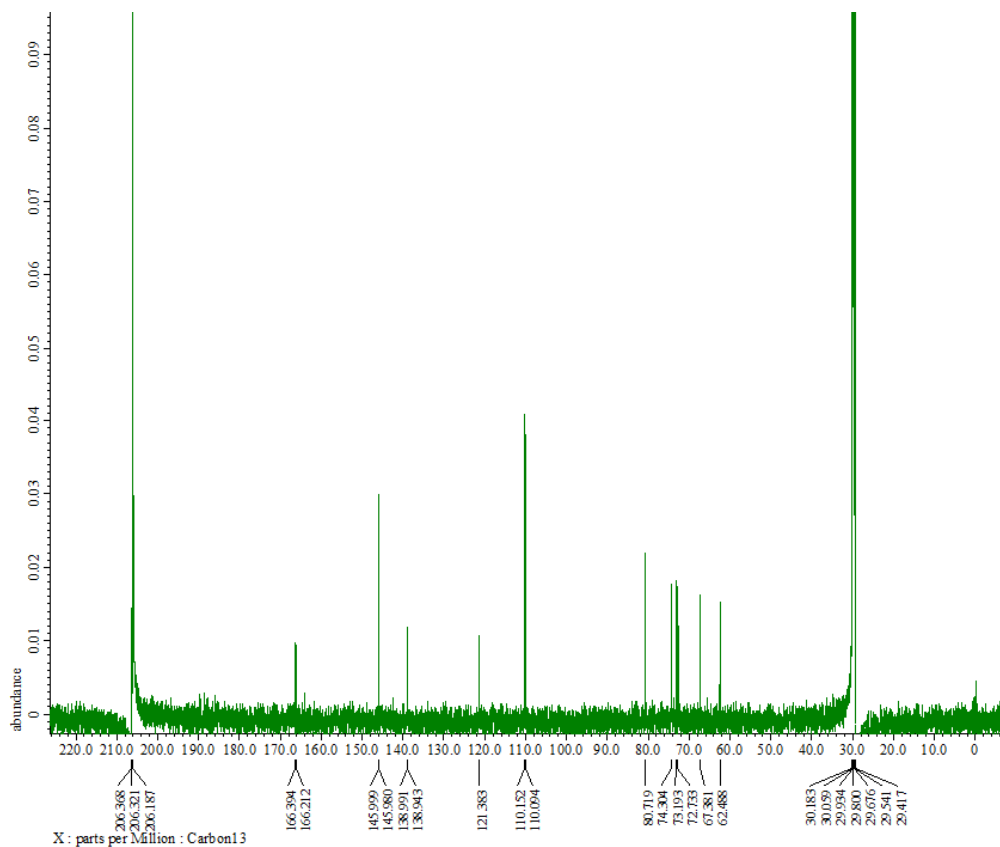

$^1\text{H}$  NMR of compound **37** in Acetone- $d_6$

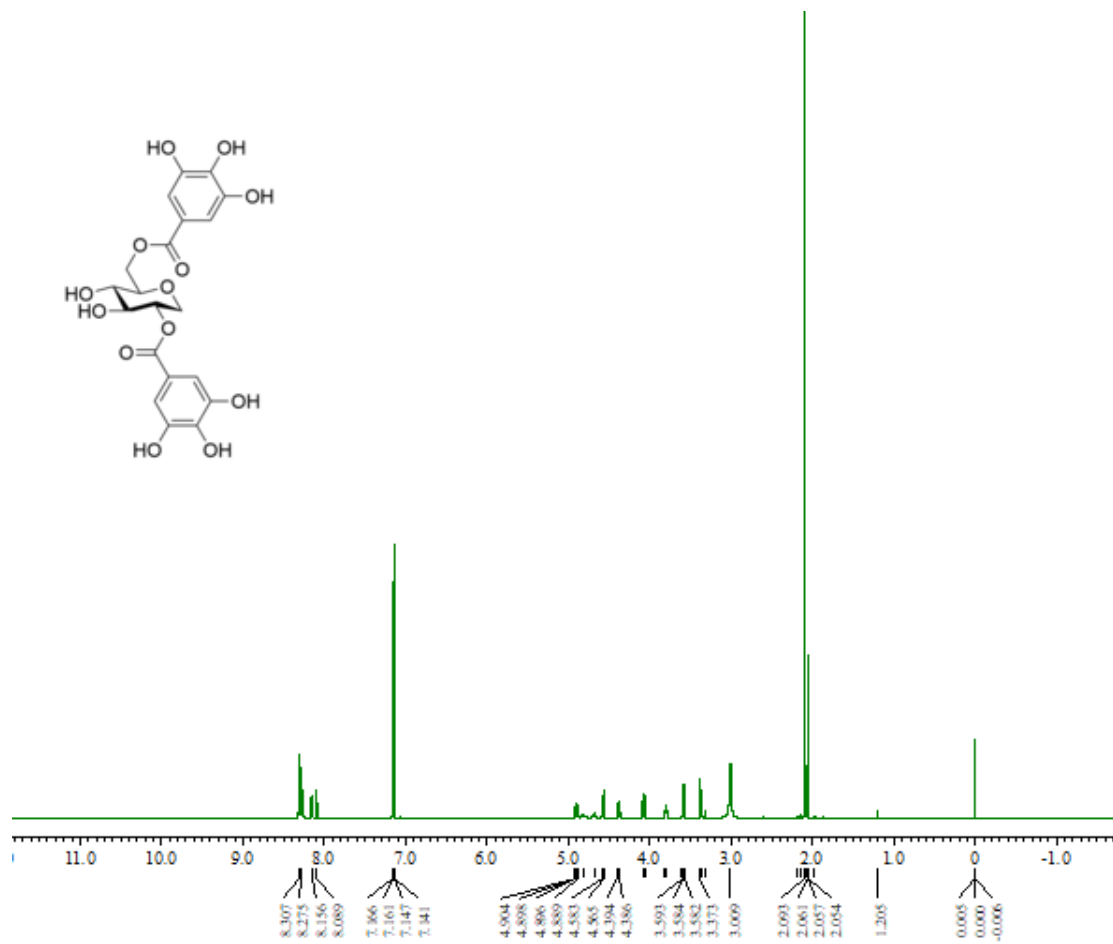

$^{13}\text{C}$  NMR of compound **37** in Acetone- $d_6$

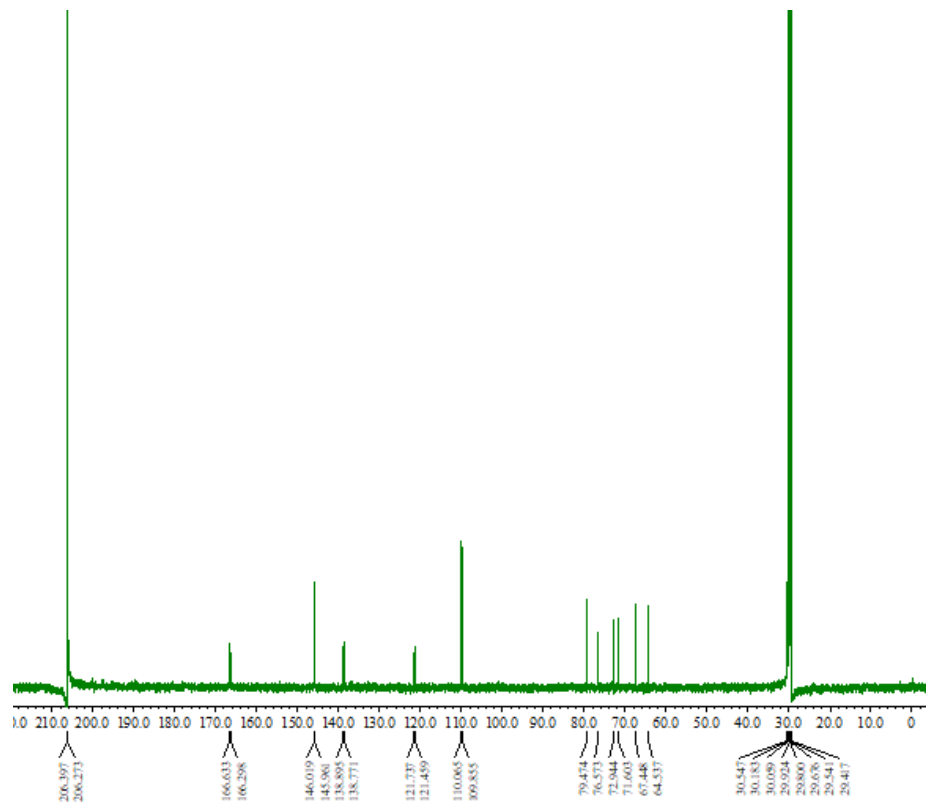



$^1\text{H}$  NMR of compound **38** in Acetone- $d_6$

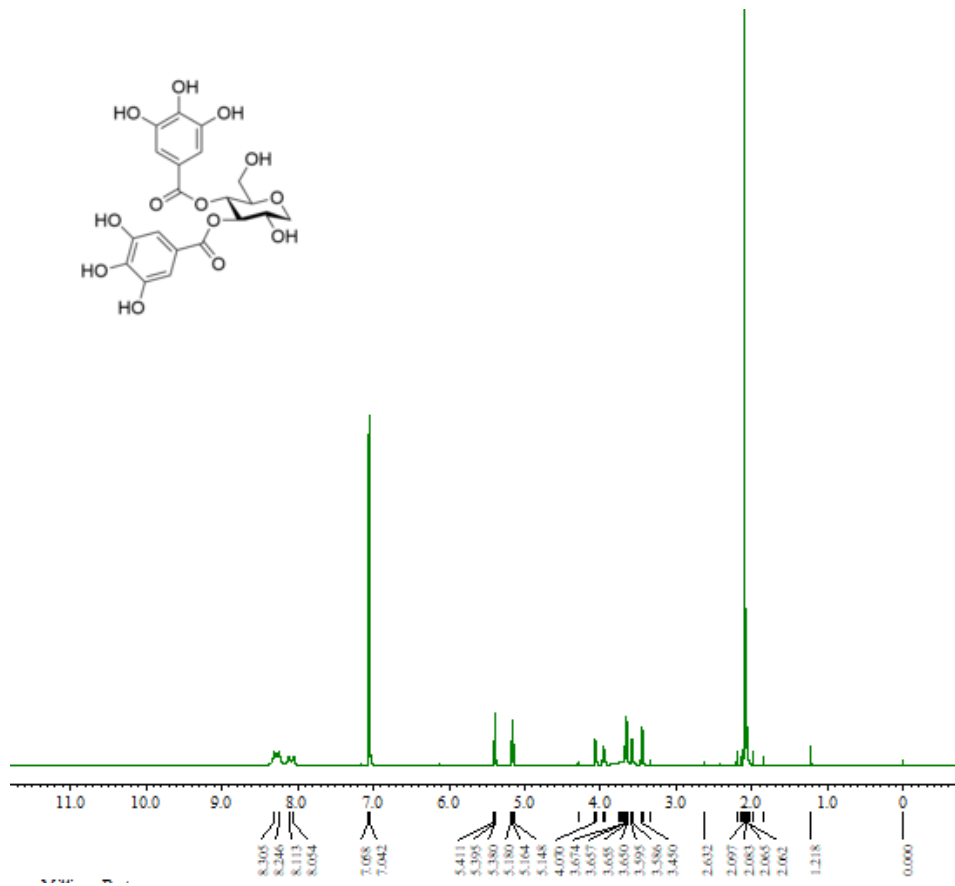

$^{13}\text{C}$  NMR of compound **38** in Acetone- $d_6$

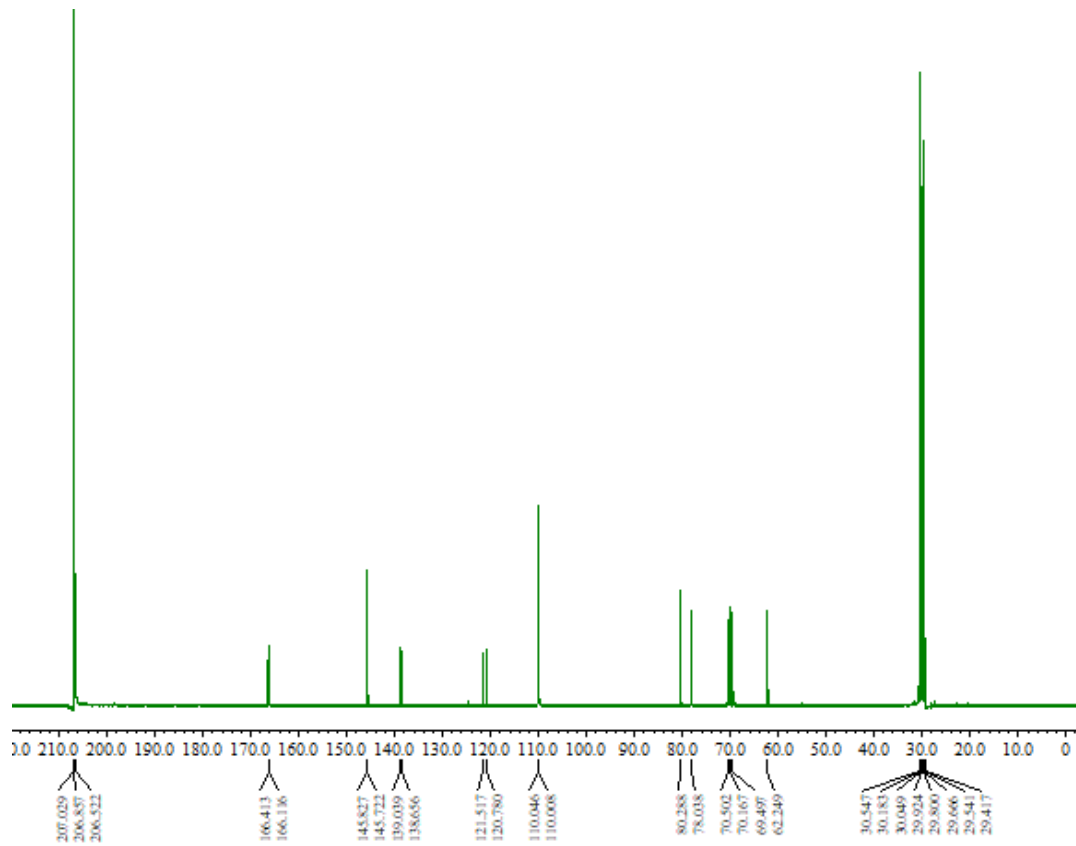

$^1\text{H}$  NMR of compound **39** in Acetone- $d_6$

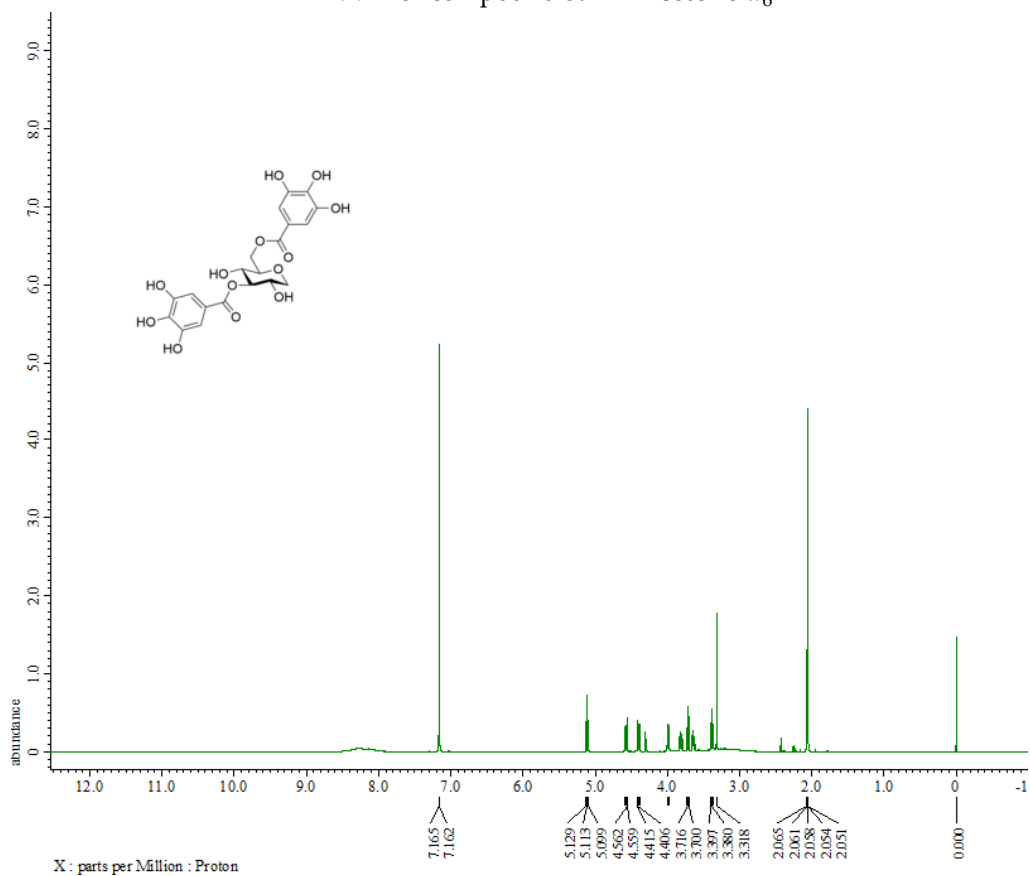

$^{13}\text{C}$  NMR of compound **39** in Acetone- $d_6$

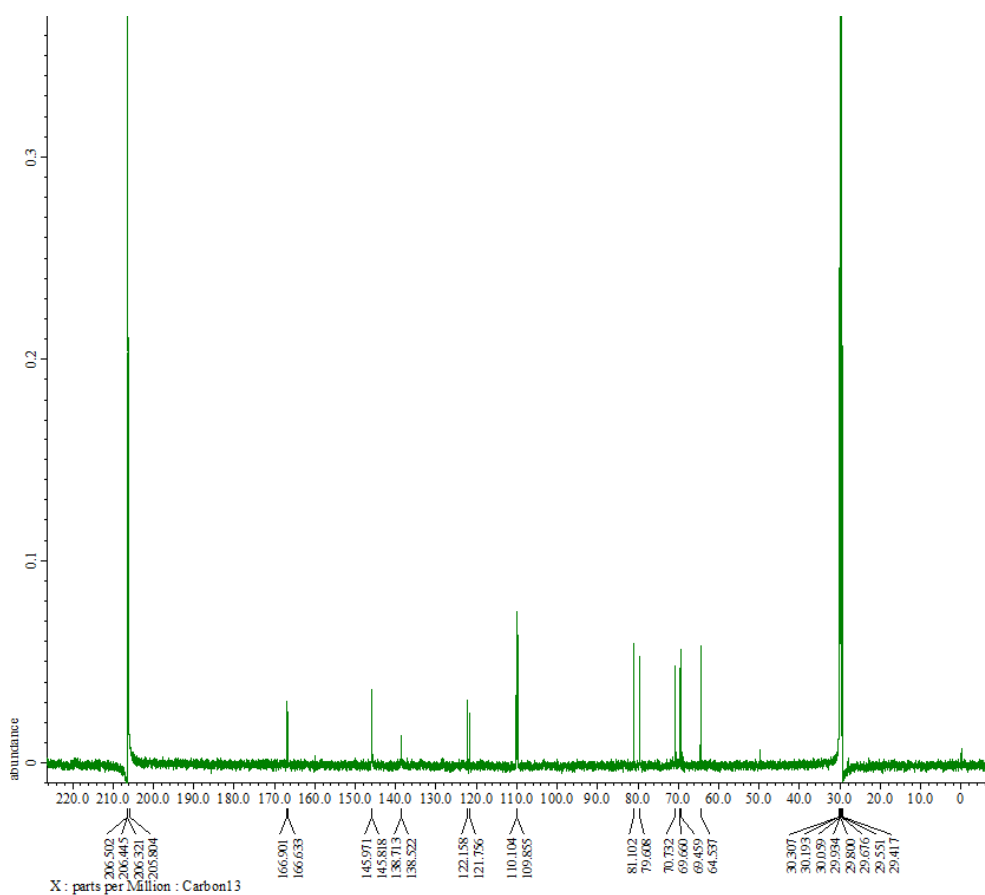

<sup>1</sup>H NMR of compound 40 in Acetone-d<sub>6</sub>

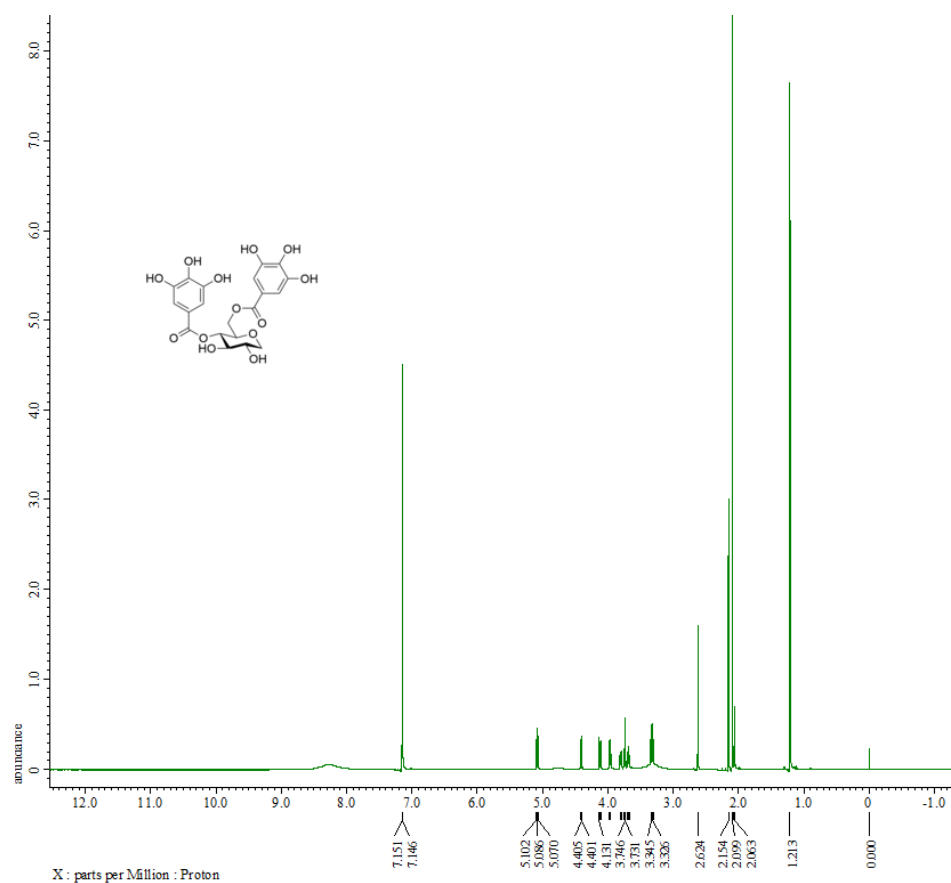

<sup>13</sup>C NMR of compound 40 in Acetone-d<sub>6</sub>

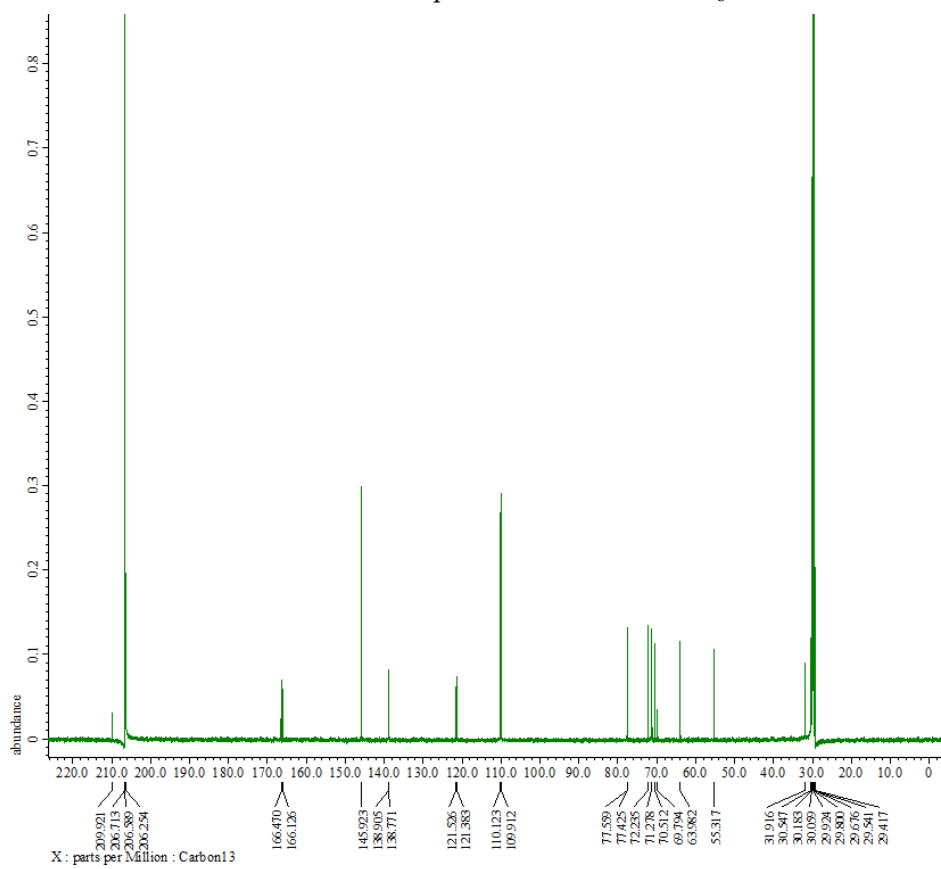

<sup>1</sup>H NMR of compound 41 in Acetone-d<sub>6</sub>

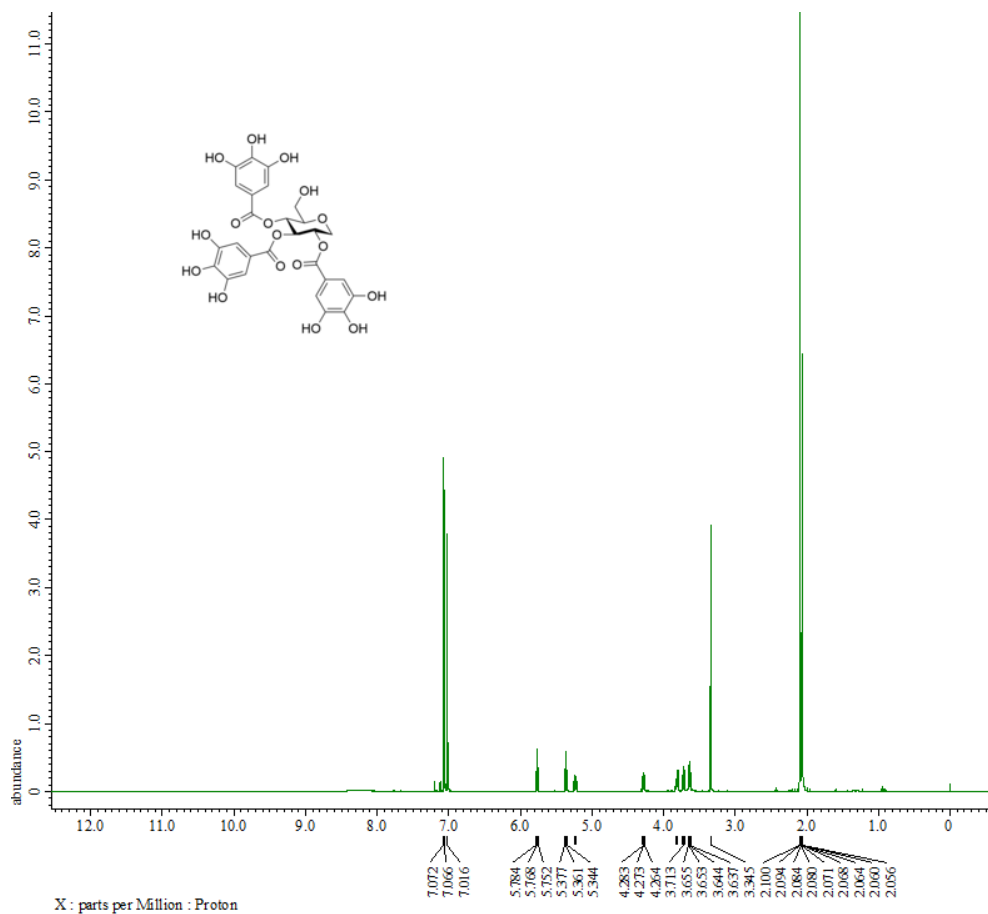

$^{13}\text{C}$  NMR of compound 41 in Acetone- $d_6$

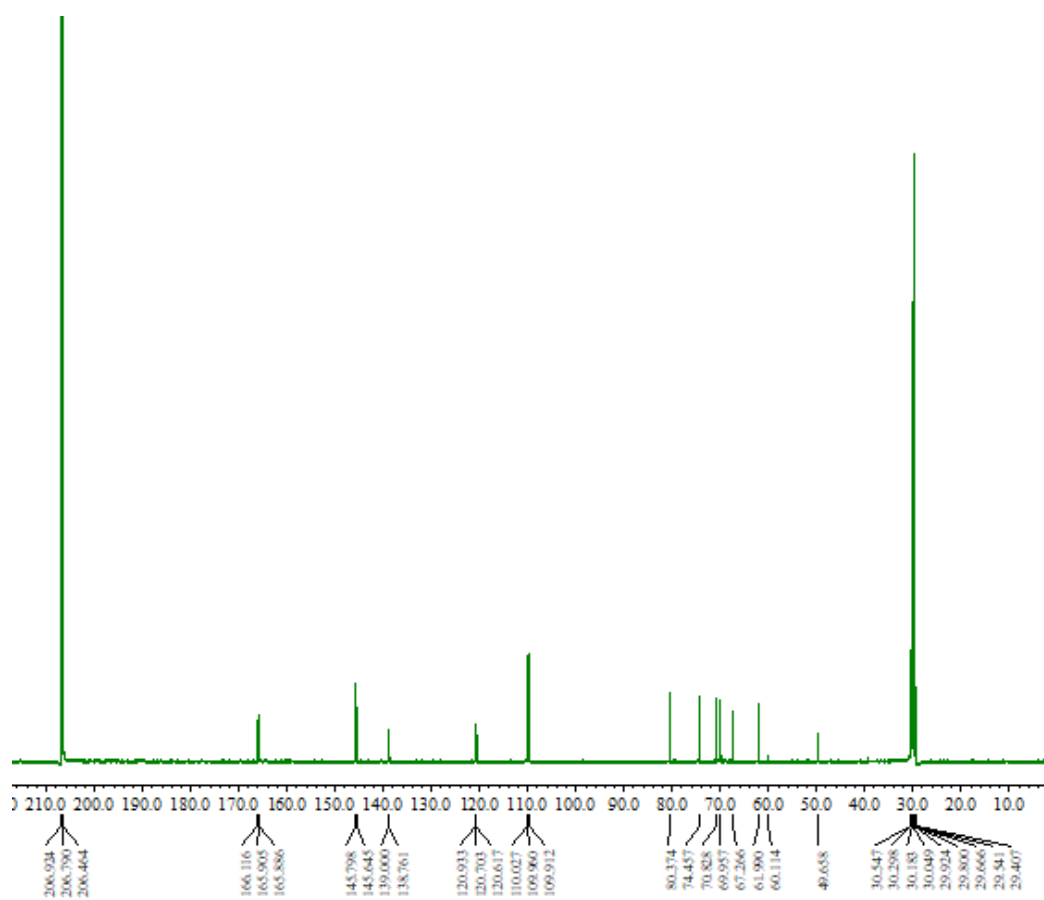

<sup>1</sup>H NMR of compound 42 in Acetone-d<sub>6</sub>

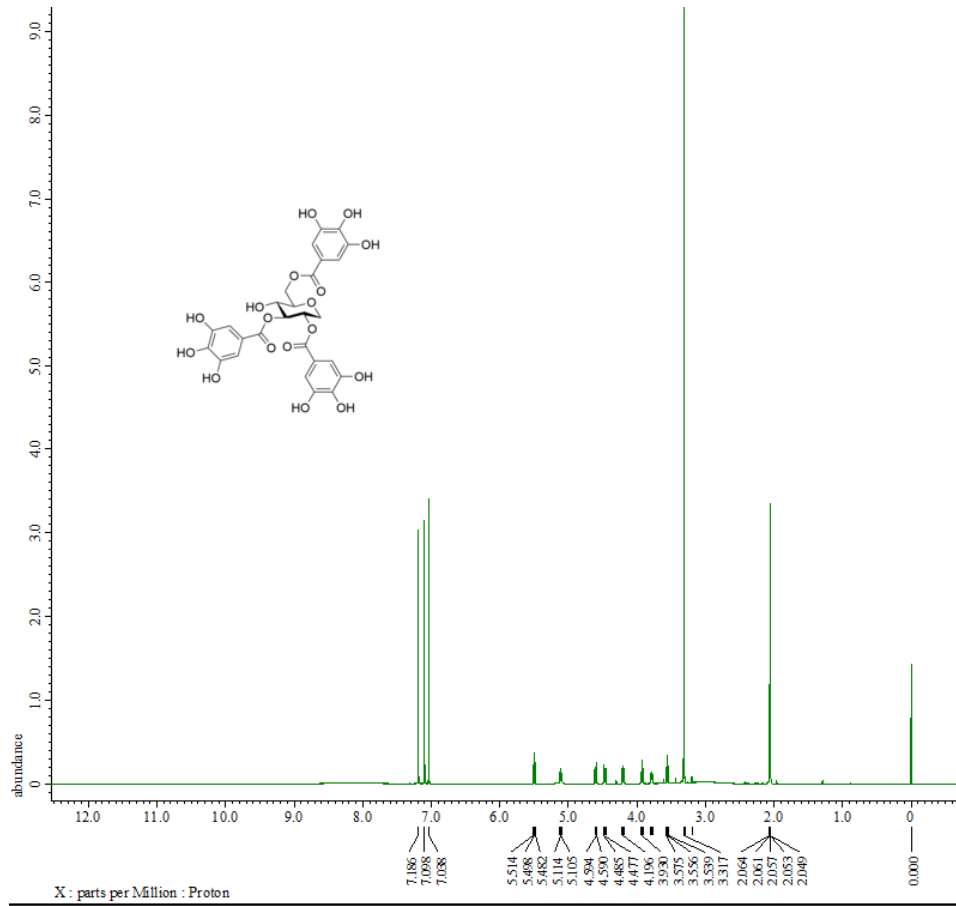

<sup>13</sup>C NMR of compound 42 in Acetone-d<sub>6</sub>

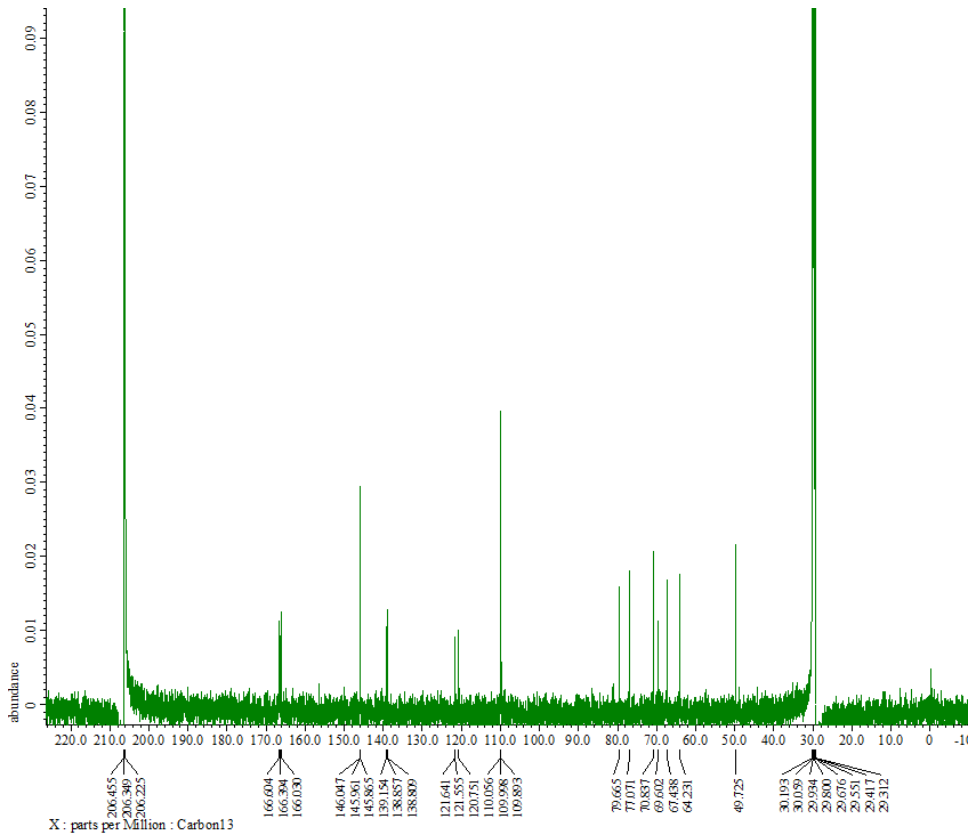

<sup>1</sup>H NMR of compound 43 in Acetone-d<sub>6</sub>

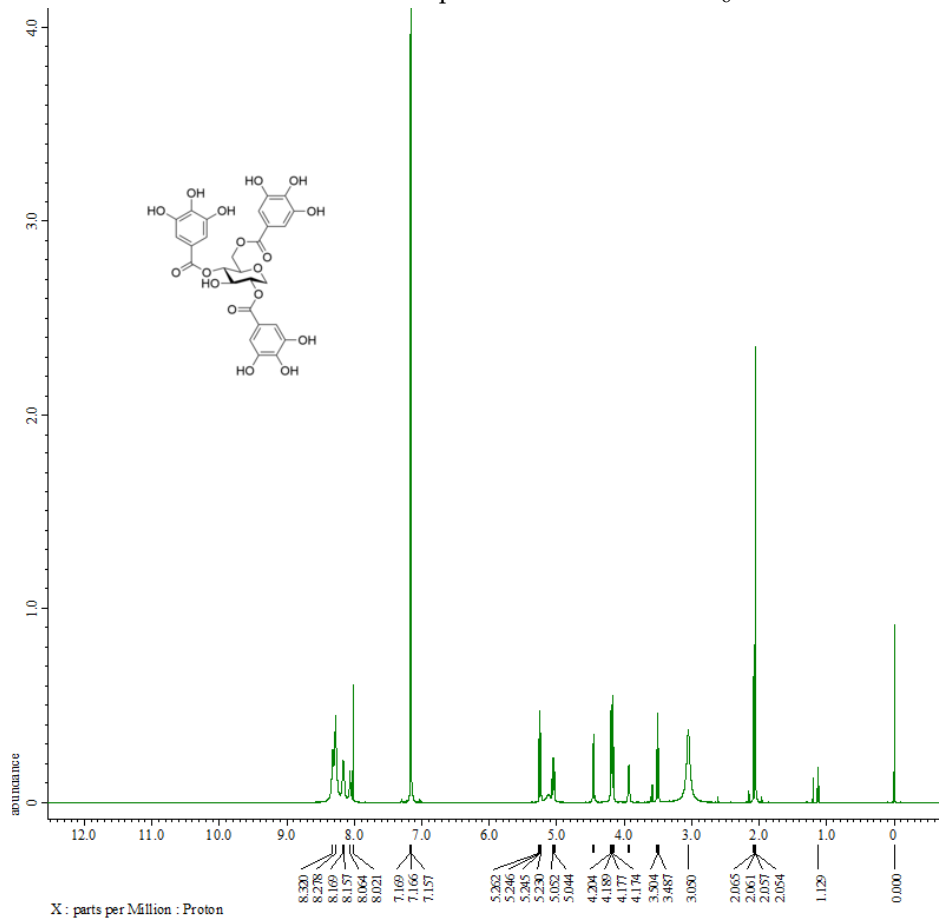

<sup>13</sup>C NMR of compound 43 in Acetone-d<sub>6</sub>

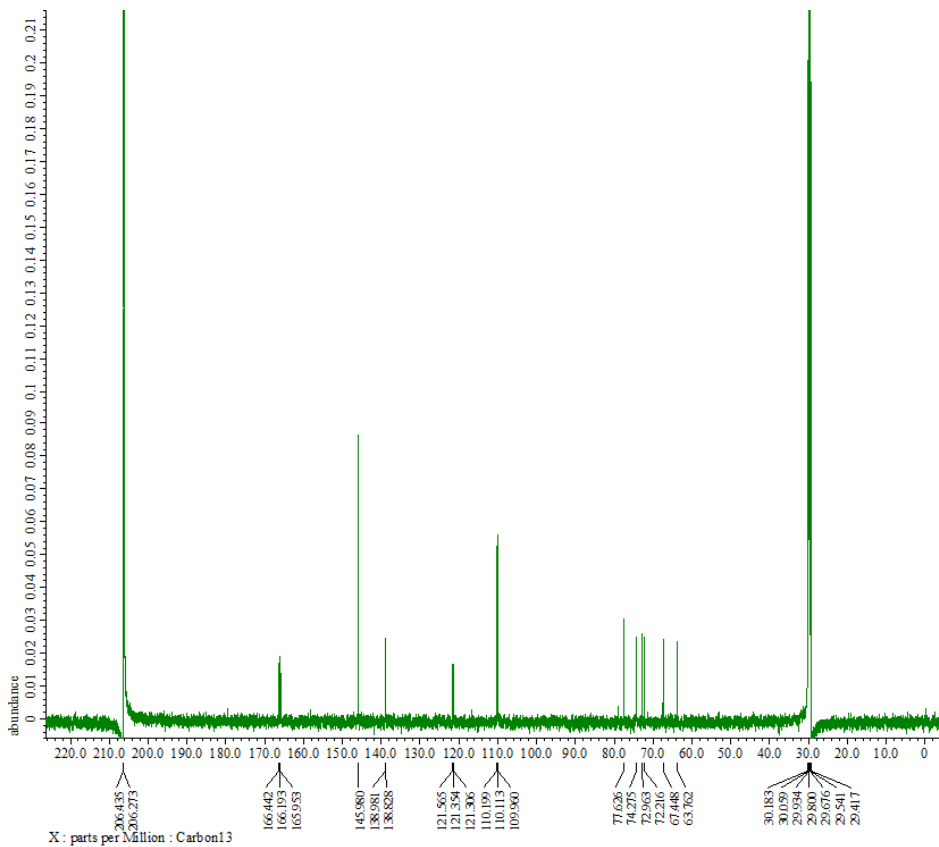

$^1\text{H}$  NMR of compound 44 in Acetone- $d_6$

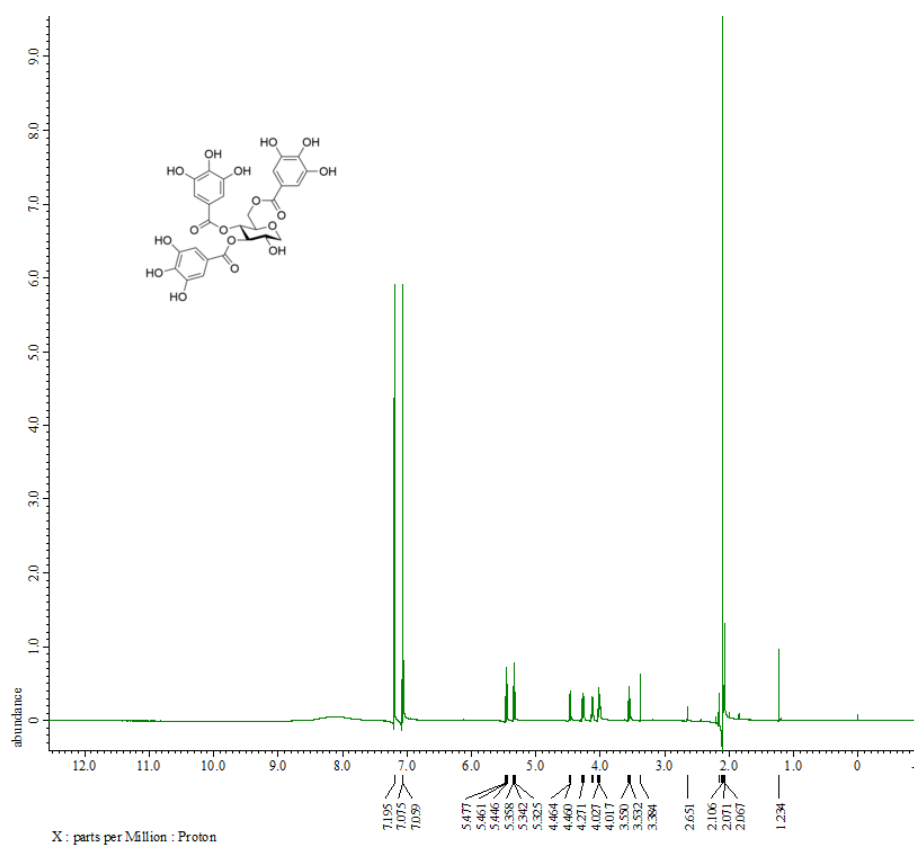

$^{13}\text{C}$  NMR of compound 44 in Acetone- $d_6$

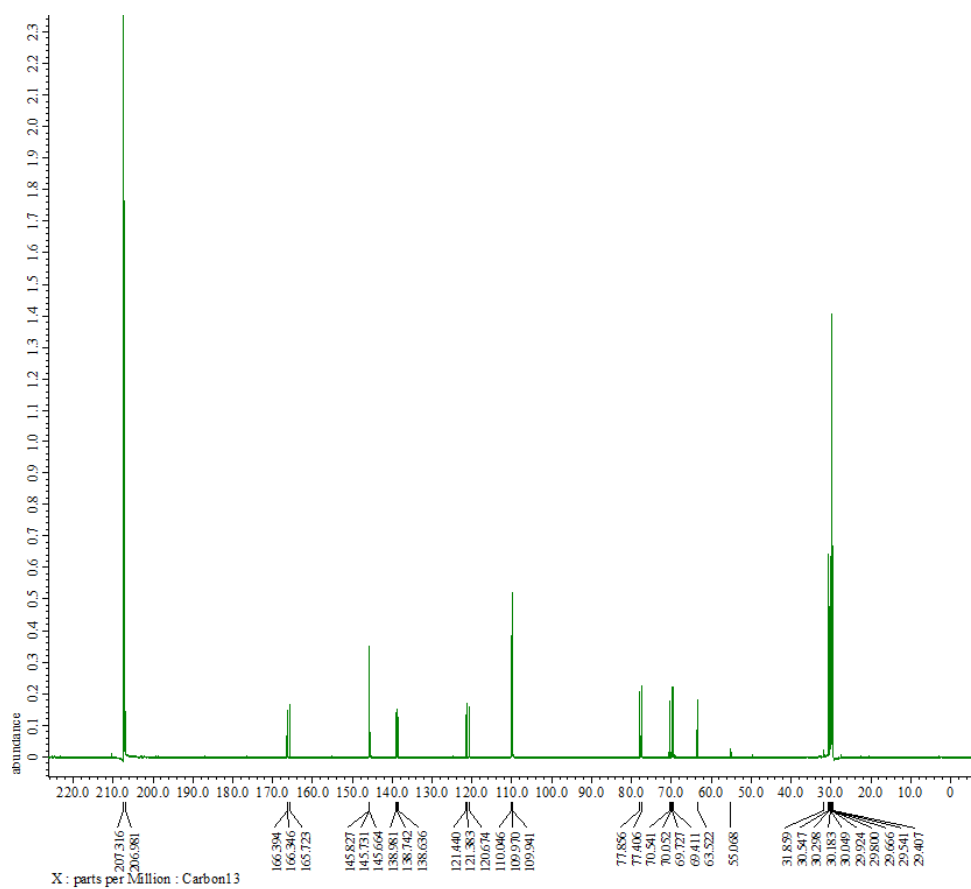

$^1\text{H}$  NMR of compound **54** in Acetone- $d_6$

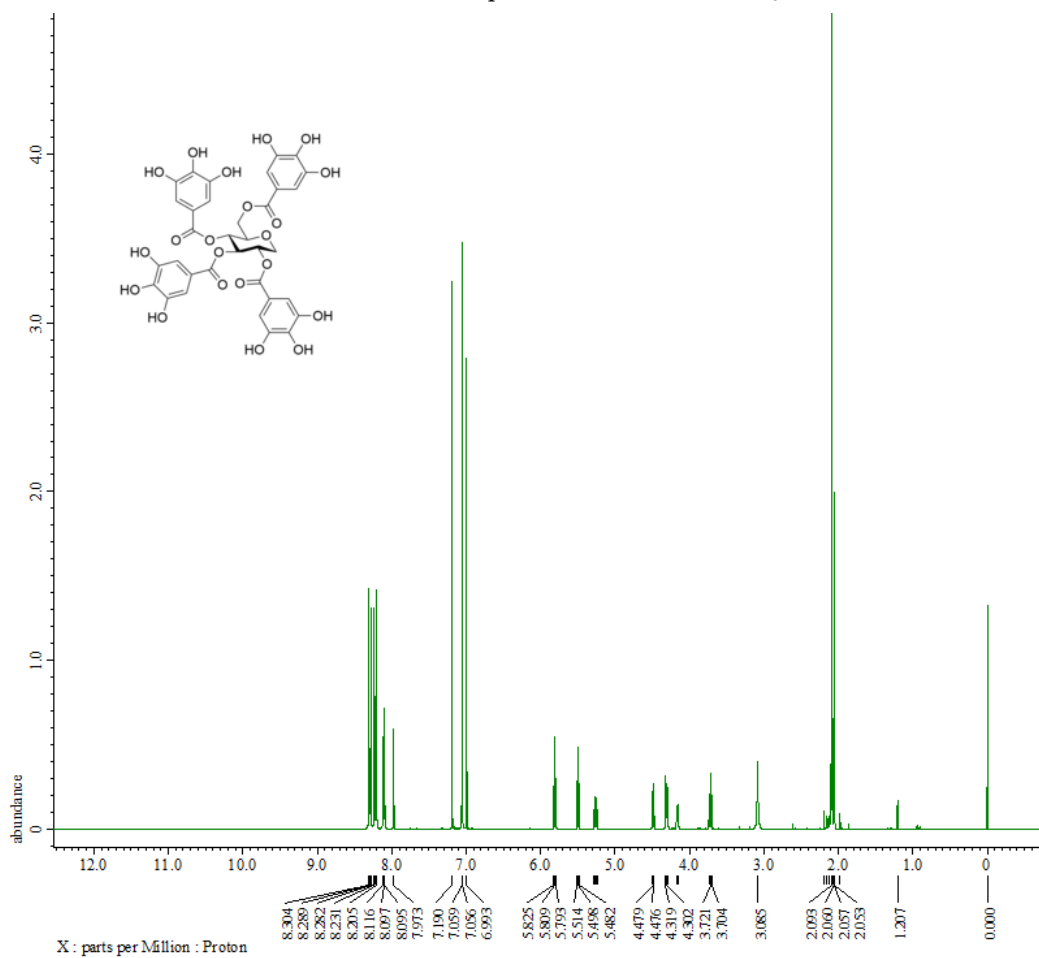

$^{13}\text{C}$  NMR of compound **54** in Acetone- $d_6$

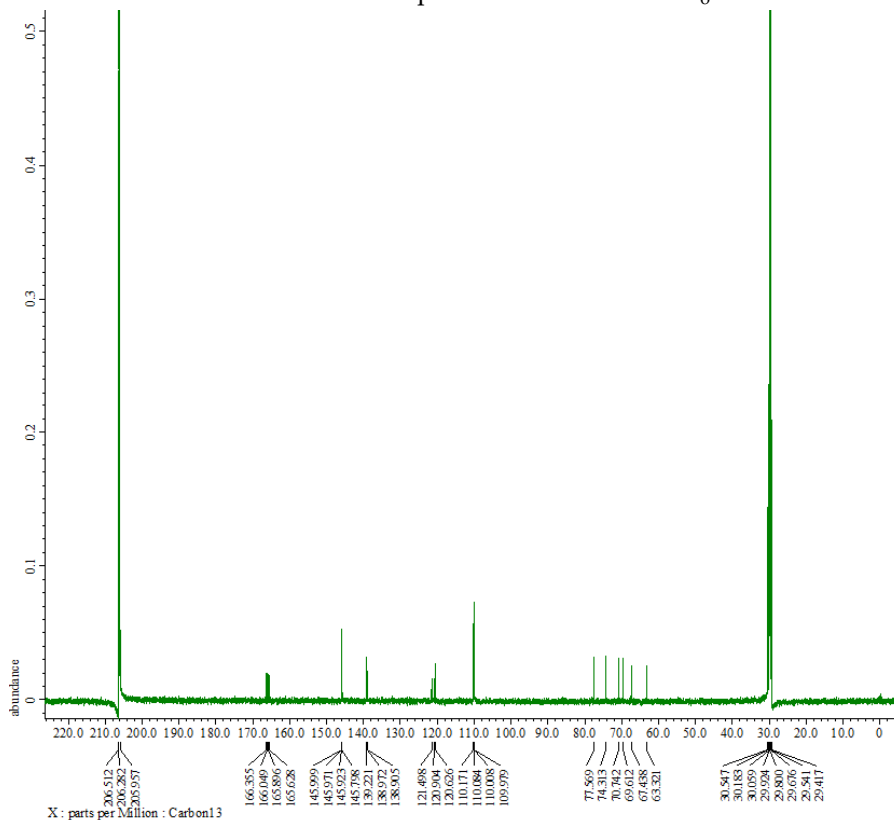



$^1\text{H}$  NMR of compound **55** in Acetone- $d_6$

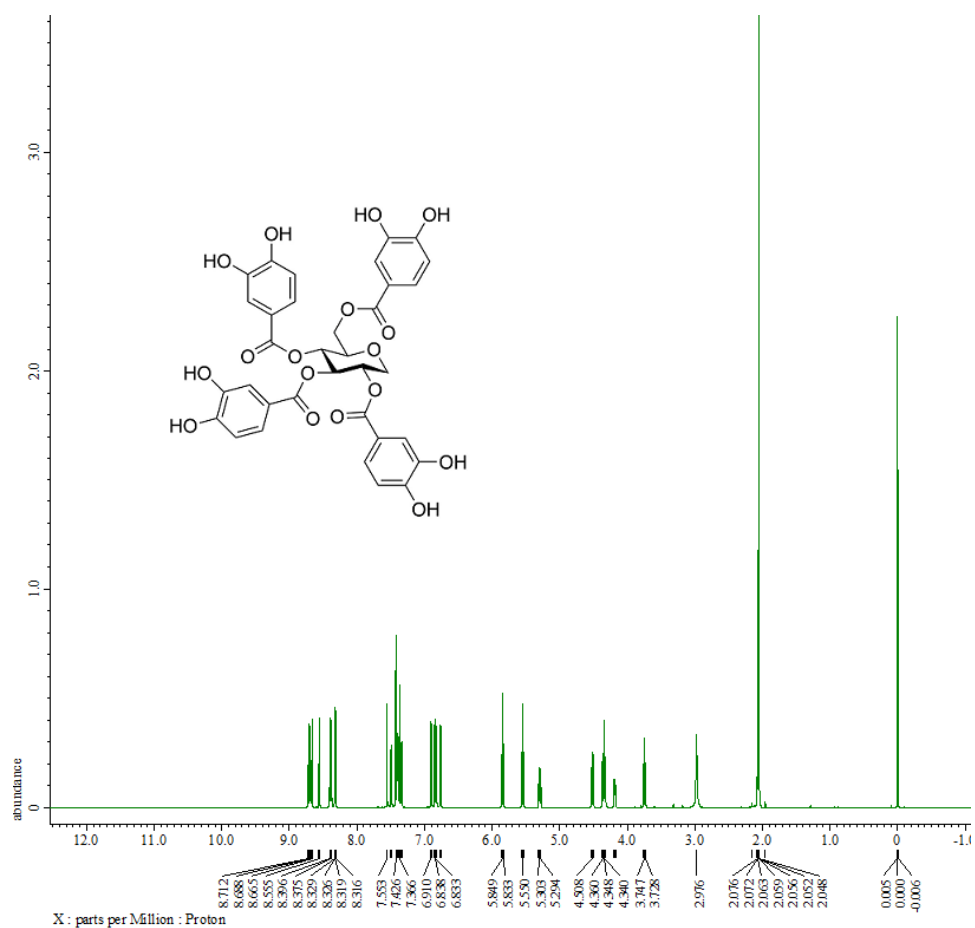

$^{13}\text{C}$  NMR of compound **55** in Acetone- $d_6$

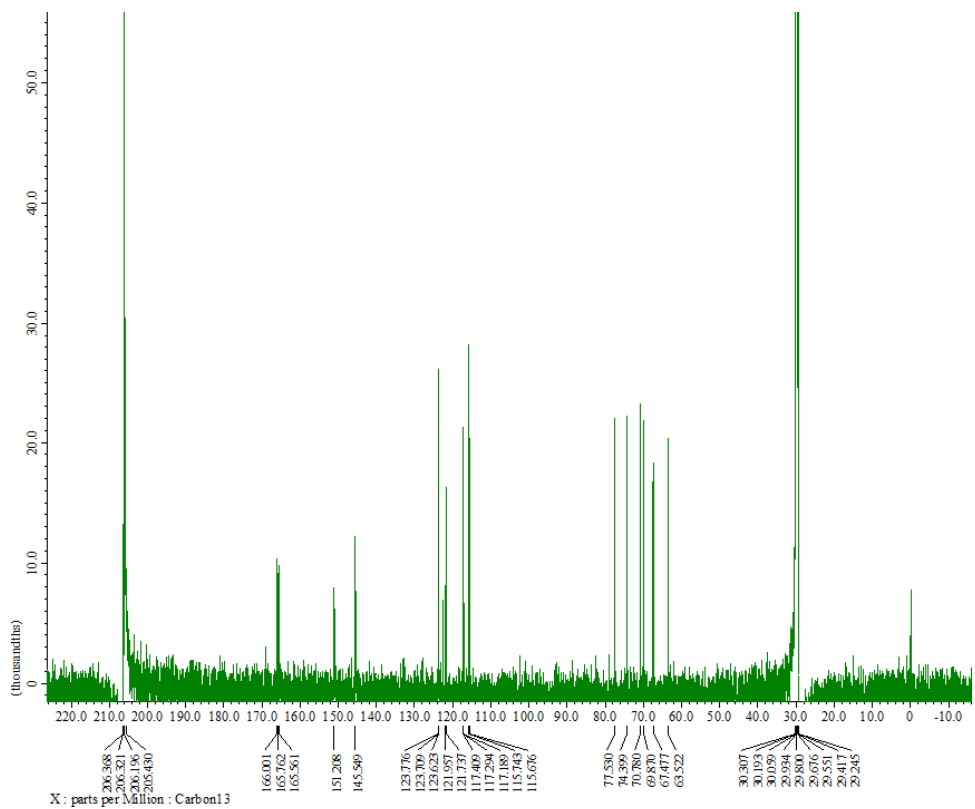

$^1\text{H}$  NMR of compound **56** in Acetone- $d_6$

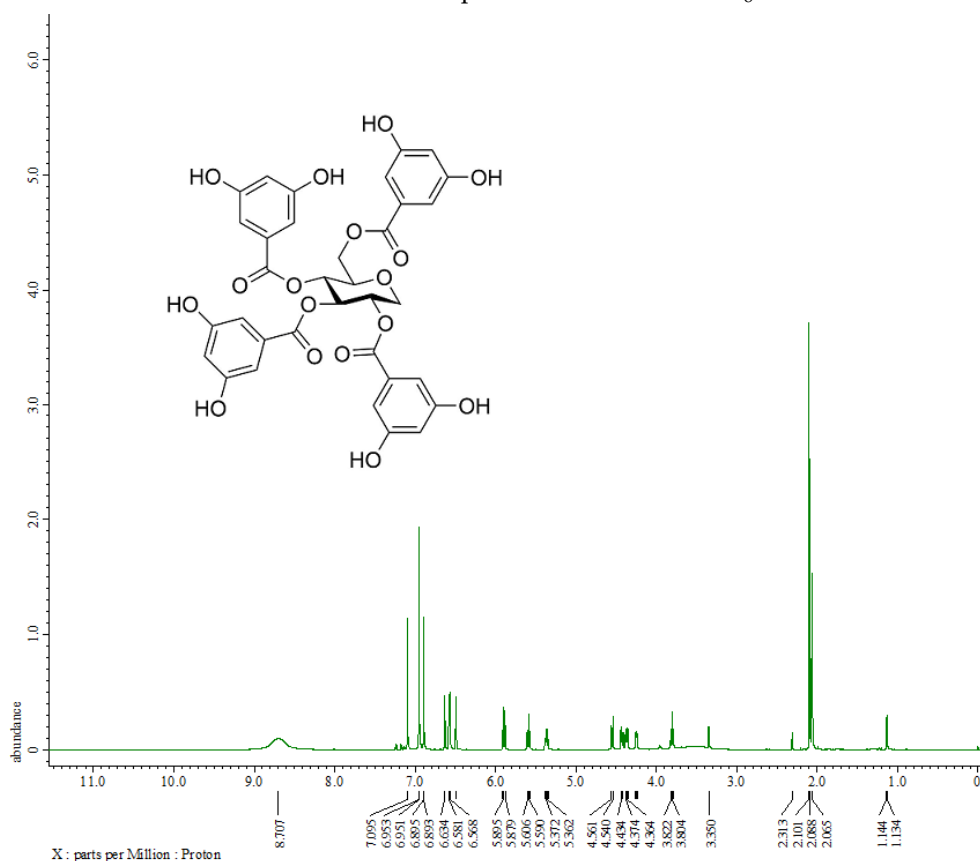

$^{13}\text{C}$  NMR of compound **56** in Acetone- $d_6$

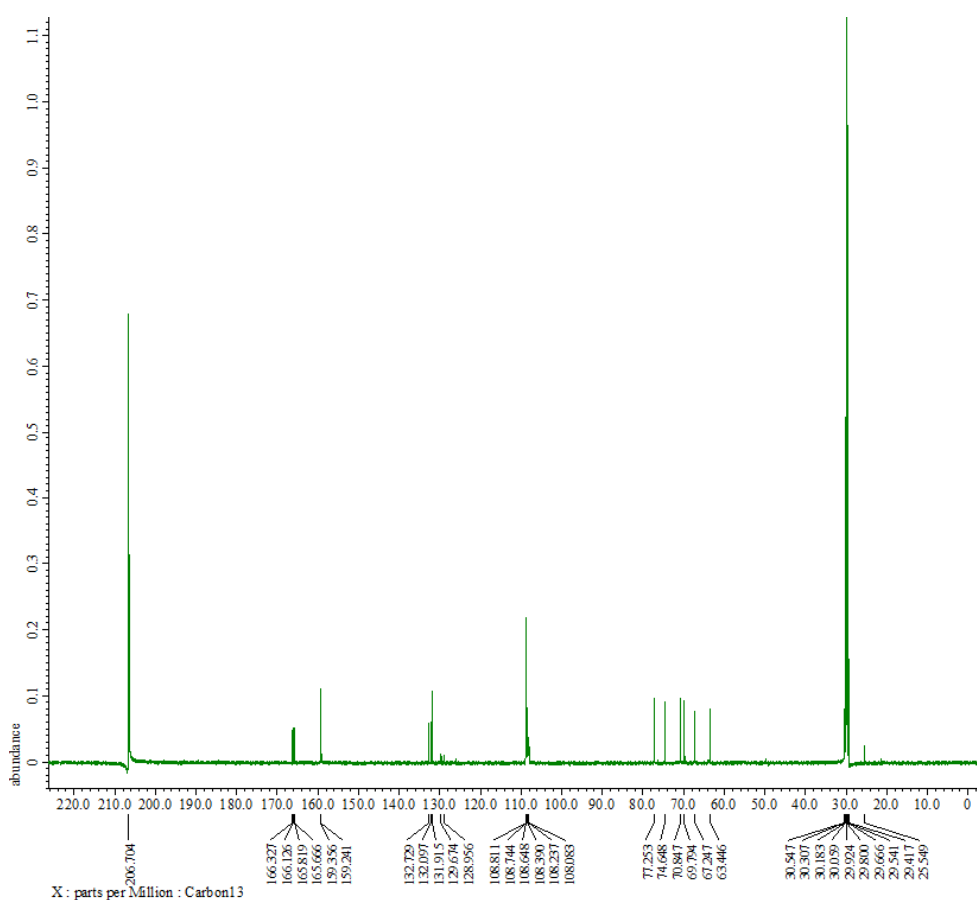

<sup>1</sup>H NMR of compound 57 in Acetone-d<sub>6</sub>

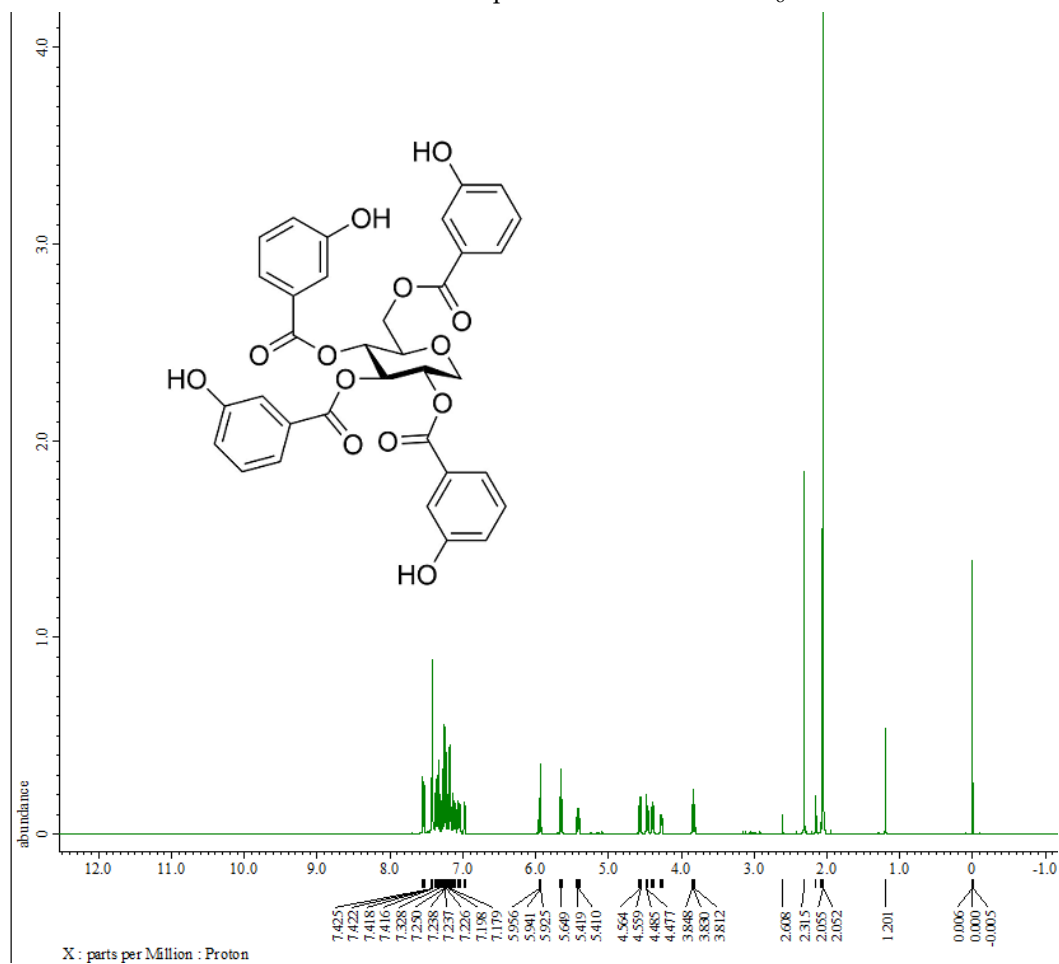

<sup>13</sup>C NMR of compound 57 in Acetone-d<sub>6</sub>

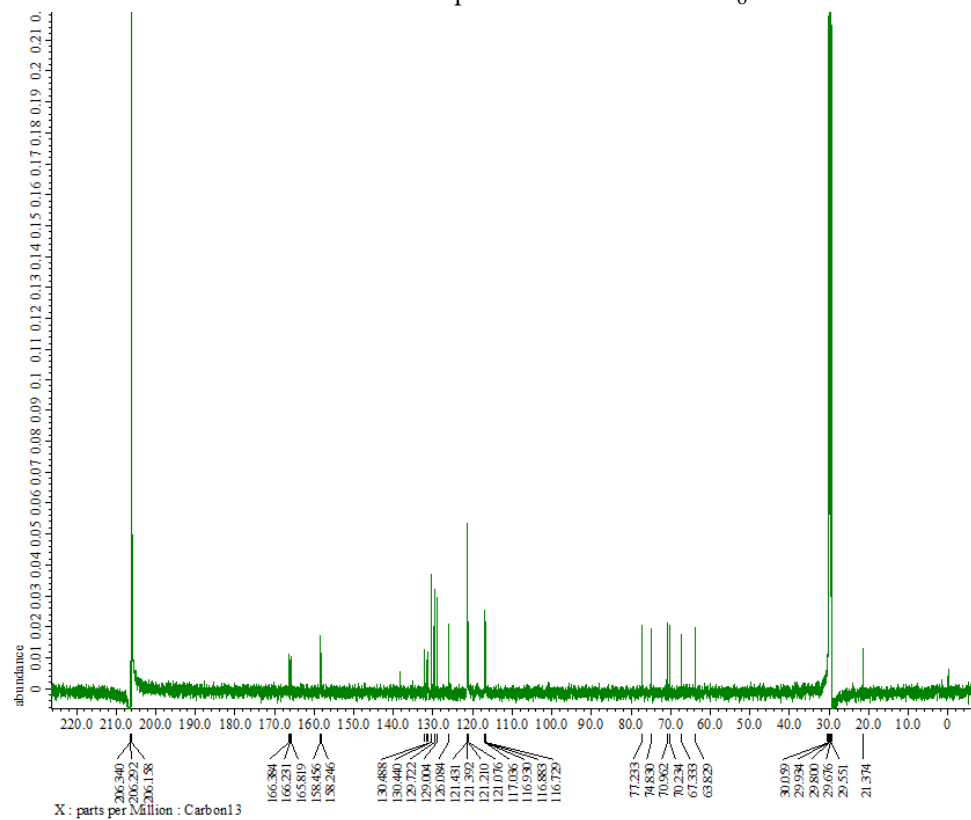

$^1\text{H}$  NMR of compound 58 in Acetone- $d_6$

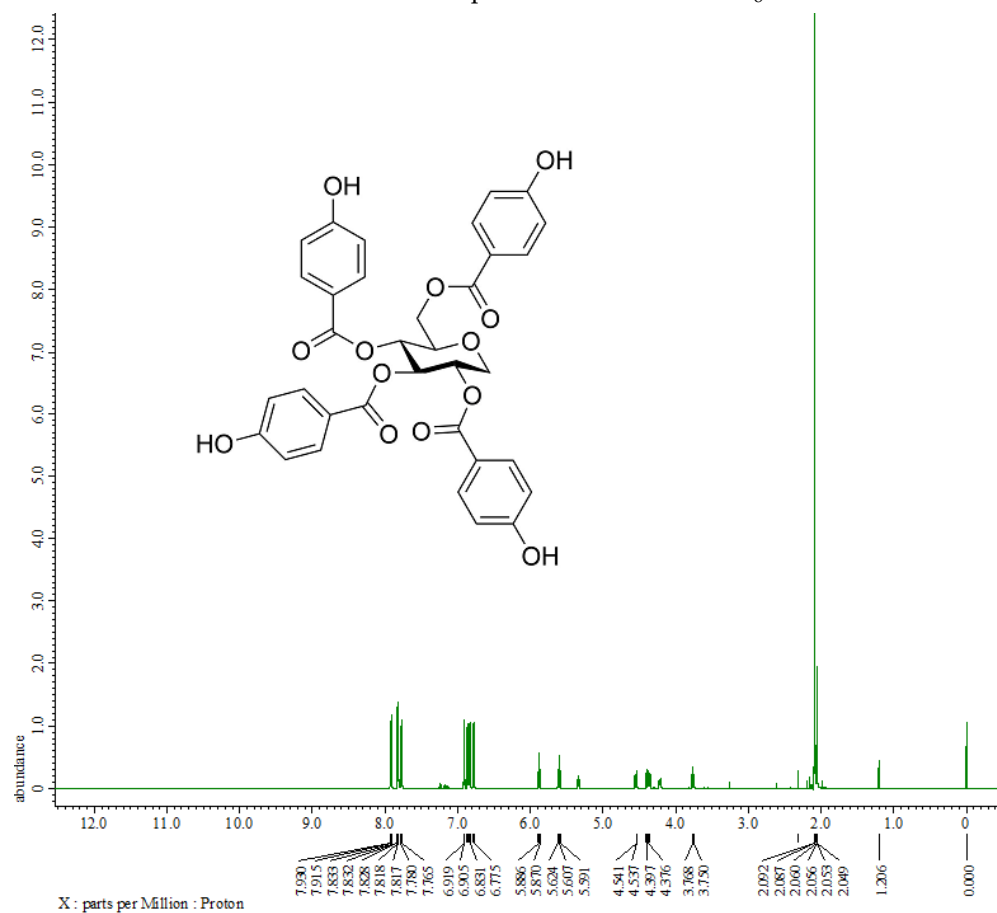

$^{13}\text{C}$  NMR of compound 58 in Acetone- $d_6$

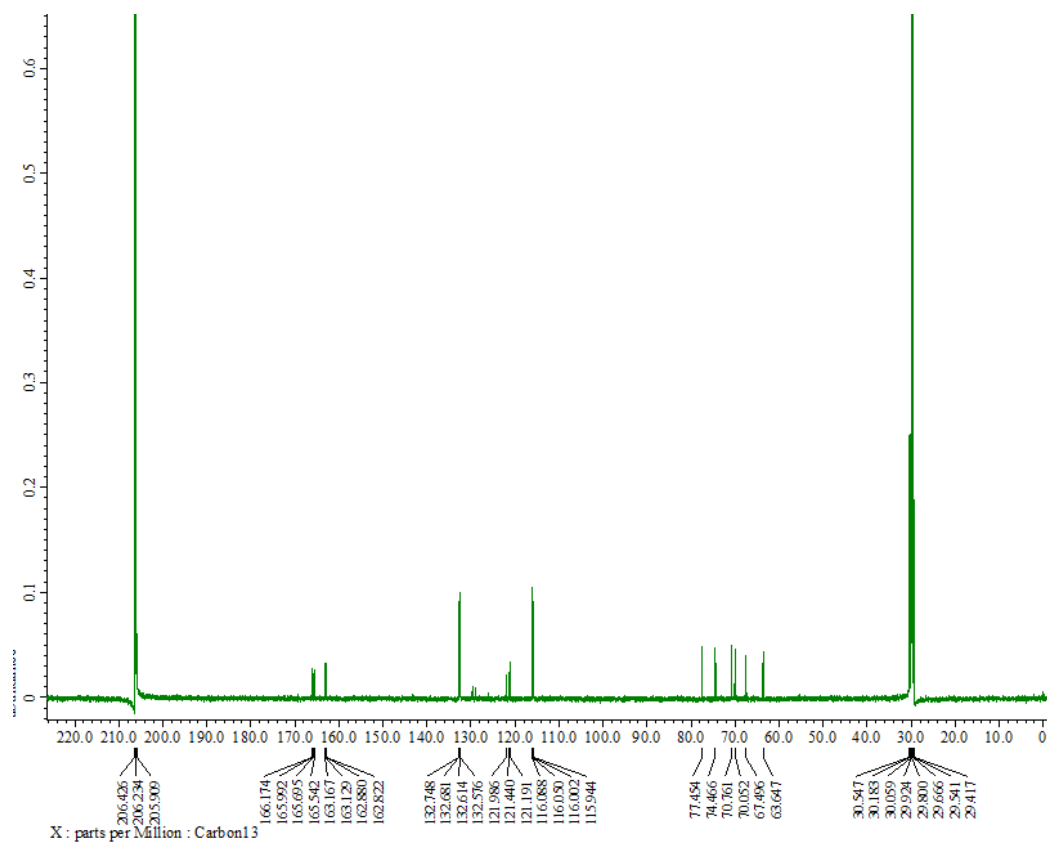

<sup>1</sup>H NMR of compound **61** in Acetone-*d*<sub>6</sub>

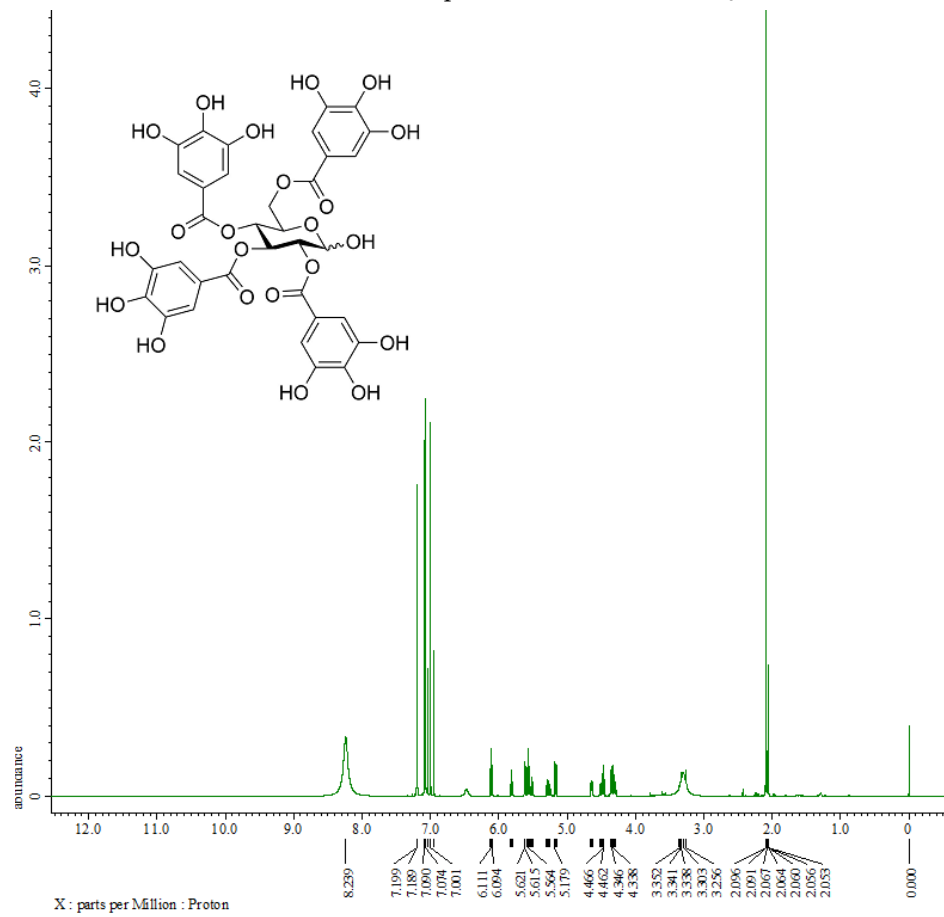

<sup>13</sup>C NMR of compound **61** in Acetone-*d*<sub>6</sub>

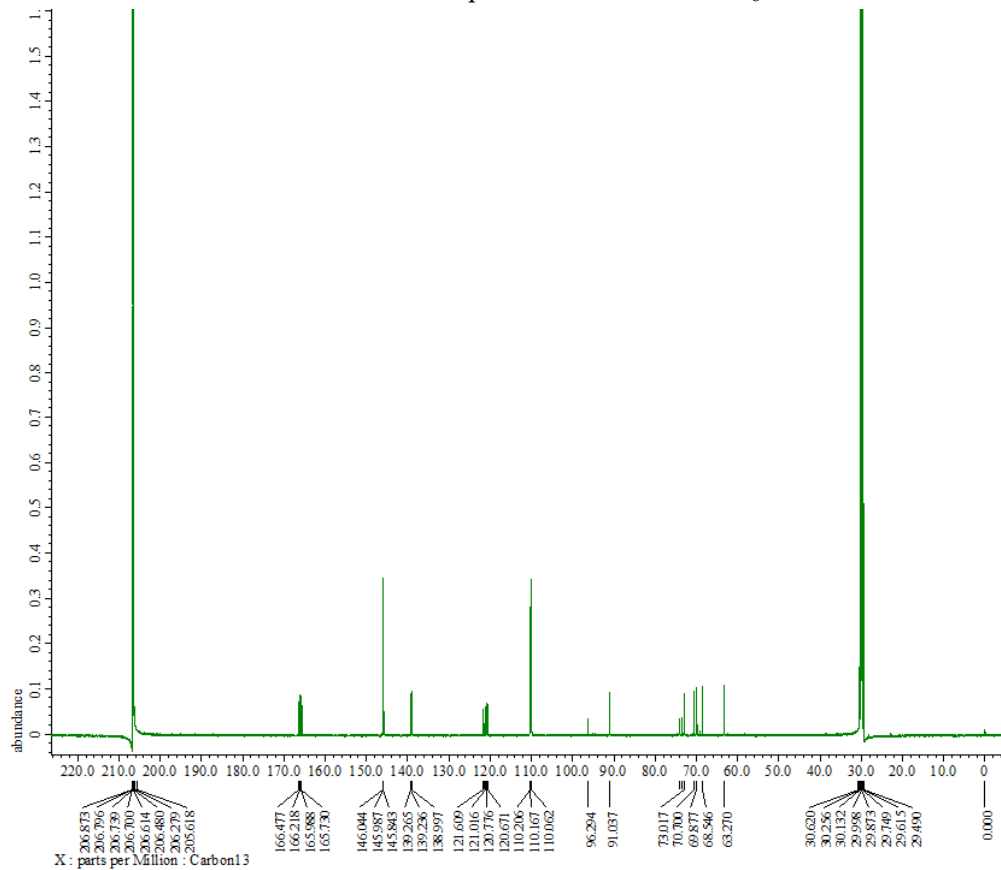

$^1\text{H}$  NMR of compound **67** in Acetone- $d_6$

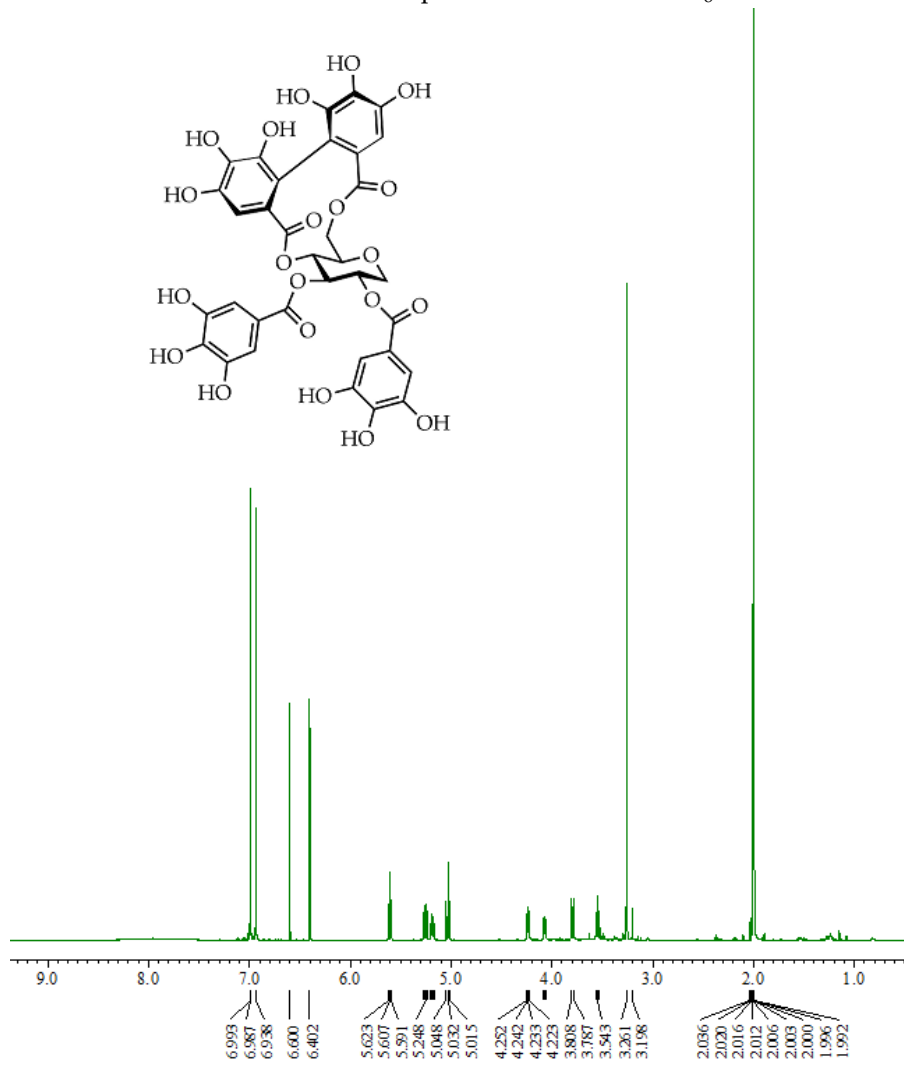

$^{13}\text{C}$  NMR of compound **67** in  $\text{CD}_3\text{OD}$

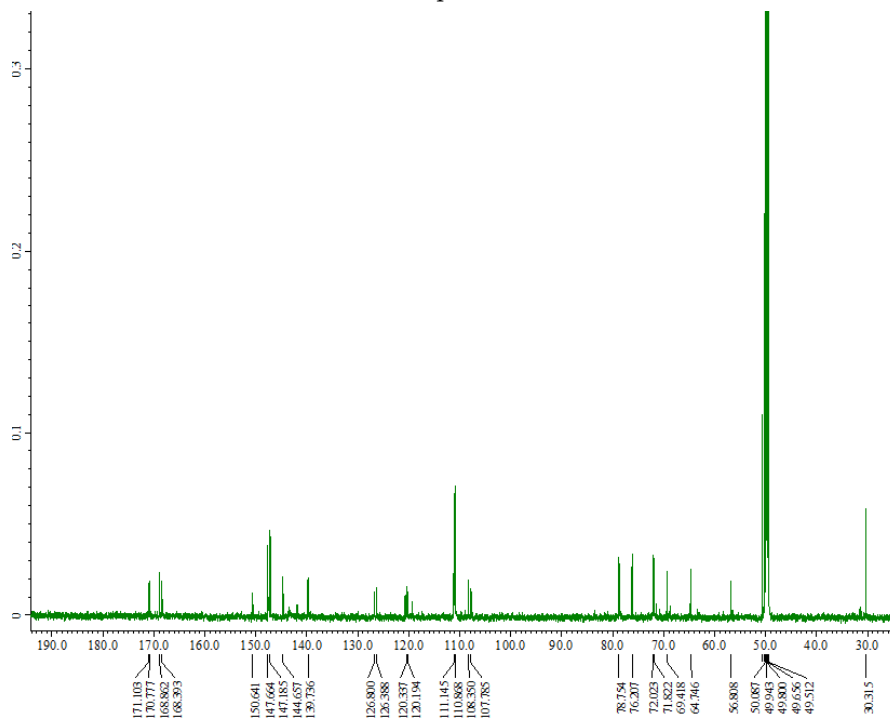

Supplement: molecules-24-04340-s001.pdf [file molecules-24-04340-s001.pdf]
